# Supplementary material
Source: PubMed Central journal article supplement (PMC4134923)

# Direct, Catalytic and Regioselective Synthesis of 2-Alkyl, Aryl, and Alkenyl-Substituted *N*-Heterocycles from *N*-Oxides

Oleg V. Larionov\*, David Stephens, Adelphe Mfuh, and Gabriel Chavez  
*Department of Chemistry, University of Texas at San Antonio, One UTSA Circle,  
San Antonio, Texas, United States*

## General Procedures

**Materials and methods:** Anhydrous ether was collected under argon from an LC Technologies solvent purification system, having been passed through two columns packed with molecular sieves. Ethanol, acetonitrile, and methanol were dried over 4Å molecular sieves. All other chemicals were used as commercially available (Sigma-Aldrich, Acros, Alfa Aesar, Combi-Blocks, Strem). All reactions were conducted with continuous magnetic stirring under an atmosphere of argon in oven-dried glassware. Reactions were monitored by TLC until deemed complete using silica gel-coated glass plates (Merck Kieselgel 60 F254). Plates were visualized under ultraviolet light (254 nm).

**Purification:** Column chromatography was performed using CombiFlash Rf-200 (Teledyne-Isco) automated flash chromatography system with self-packed RediSep columns.

**Characterization:**  $^1\text{H}$ ,  $^{13}\text{C}$  NMR,  $^{19}\text{F}$  spectra were recorded at 300 and 500 MHz ( $^1\text{H}$ ), 75.5 and 125 MHz ( $^{13}\text{C}$ ), and 252 MHz ( $^{19}\text{F}$ ) on Varian Mercury VX 300 and Agilent Inova 500 instruments in  $\text{CDCl}_3$  solutions if not otherwise specified. Chemical shifts ( $\delta$ ) are reported in parts per million (ppm) from the residual solvent peak and coupling constants ( $J$ ) in Hz. Proton multiplicity is assigned using the following abbreviations: singlet (s), doublet (d), triplet (t), quartet (quart), quintet (quint), septet (sept), multiplet (m), broad (br s).

Infrared measurements were carried out neat on a Bruker Vector 22 FT-IR spectrometer fitted with a Specac diamond attenuated total reflectance (ATR) module.

### 7-Chloro-4-methoxyquinoline<sup>1</sup> (**S1**)

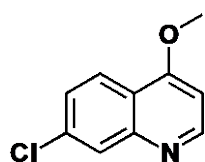

To a solution of 4,7-dichloroquinoline (5 g, 25.51 mmol) in methanol (50 mL) was added sodium methoxide (6.88 g, 127.55 mmol, 5 equiv). The reaction was heated at 95 °C for 12 h, then concentrated under reduced pressure and diluted with EtOAc (30 mL) and washed with H<sub>2</sub>O (2 x 20 mL). The organic layer was dried over anhydrous sodium sulfate and concentrated under reduced pressure to yield **S1** (4.78 g, 97 %) as colorless solid. – <sup>1</sup>H NMR (300 MHz): 3.19 (3 H, s), 6.58 (1 H, d, *J* = 5.5 Hz), 7.32 (1 H, dd, *J* = 2, 9 Hz), 7.92 (1 H, d, *J* = 2 Hz), 7.98 (1 H, d, *J* = 9 Hz), 8.62 (1 H, d, *J* = 5 Hz) ppm. – <sup>13</sup>C NMR (75 MHz): 55.71, 100.26, 119.66, 123.36, 126.34, 127.64, 135.54, 149.45, 152.42, 162.16 ppm. – IR: 982, 1070, 1209, 1360, 1425, 1503, 1616, 2984, 3050 cm<sup>-1</sup>.

### 4-Methoxyquinoline<sup>1</sup> (**S2**)

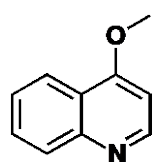

To a solution of **S1** (3 g, 15.54 mmol) in ethanol (103 mL) was added palladium (333 mg, 10 % palladium on charcoal) and lithium carbonate (2.51 g, 34.50 mmol, 2.22 equiv). Hydrogen was bubbled through the reaction, followed by stirring under a positive hydrogen pressure at 23 °C for 12 h. The reaction was filtered through celite, and the celite pad was washed with dichloromethane (3 x 25 mL). The solution was concentrated under reduced pressure to yield **S2** (2.4 g, 97 %) as white solid. – m.p.: 38–41 °C<sup>2</sup>. – <sup>1</sup>H NMR (300 MHz): 4.03 (3 H, s), 6.71 (1 H, d, *J* = 5 Hz), 7.49 (1 H, t, *J* = 7 Hz), 7.68 (1 H, t, *J* = 7 Hz), 8.03 (1 H, d, *J* = 8 Hz), 8.19 (1 H, d, *J* = 8 Hz), 8.75 (1 H, d, *J* = 5 Hz) ppm. – <sup>13</sup>C NMR (75 MHz): 55.65, 100.02, 121.75, 125.58, 128.30, 128.87, 129.72, 149.12, 151.38, 162.24 ppm. – IR: 1156, 1311, 1457, 1540, 2999, 3135 cm<sup>-1</sup>.

### 5-Amino-2-((diethylamino)methyl)phenol dihydrochloride (S3)

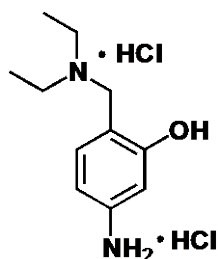

S3 was prepared according to the literature procedure.<sup>3</sup>

### 5,7-Dichloro-4-(4-fluorophenoxy)quinoline 1-oxide<sup>4</sup> (S4)

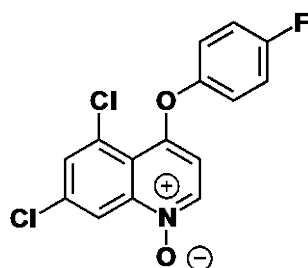

Quinoxifen (200 mg, 0.649 mmol) was reacted with *meta*-chloroperoxybenzoic acid (322 mg, 0.937 mmol, 1.5 equiv, 52 % purity) in dichloromethane (2 mL). After 12h the reaction was diluted with a 1:1 mixture of sodium carbonate and sodium thiosulfate (5 mL). After separating the organic layer, the aqueous layer was extracted with chloroform (3 x 5 mL), dried

over anhydrous sodium sulfate, and concentrated under reduced pressure to afford **S4** (172 mg, 82 %) as yellow solid. – <sup>1</sup>H NMR (500 MHz): 6.57 (1 H, d, *J* = 6.5 Hz), 7.06–7.12 (4 H, m), 7.63 (1 H, d, *J* = 1.5 Hz), 8.34 (1 H, 6.5 Hz), 8.72 (1 H, s) ppm. – <sup>13</sup>C NMR (125 MHz): 107.70, 117.19 (d, *J* = 23.5 Hz), 119.26 (d, *J* = 51 Hz), 121.75 (d, *J* = 8.5 Hz), 128.24, 131.77 (d, *J* = 74 Hz) 137.03, 143.61, 150.05 (d, *J* = 2 Hz), 153.01, 158.99, 160.94 ppm. – <sup>19</sup>F NMR (252 MHz): –116.42 ppm. – IR: 1012, 1091, 1174, 1254, 1303, 1415, 1563, 1641, 2988, 3071, 3102 cm<sup>-1</sup>.

### Quinoline 1-oxide<sup>4a</sup> (1)

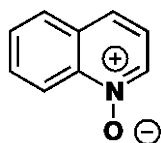

**1** was prepared according to literature procedure.<sup>4a</sup> – m.p.: 60–62 °C.<sup>5</sup> – <sup>1</sup>H NMR (300 MHz): 7.29 (1 H, dd, *J* = 6, 8 Hz), 7.64 (1 H, dt, *J* = 1, 7 Hz), 7.72–7.79 (2 H, m), 7.86 (1 H, dd, *J* = 1.5, 8 Hz), 8.52 (1 H, dd, *J* = 1, 6

Hz) ppm. –  $^{13}\text{C}$  NMR: 119.81, 120.96, 125.87, 128.12, 128.76, 130.41, 130.50, 135.60 ppm. – IR: 1157, 1311, 1452, 1554, 2931, 2995, 3025  $\text{cm}^{-1}$ .

#### 4-Methoxyquinoline 1-oxide<sup>4a, 6</sup> (**4b**)

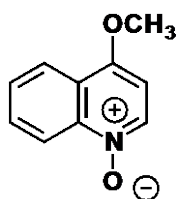

**S2** (2.76 g, 17.36 mmol) was reacted with *meta*-chloroperoxybenzoic acid (8.61 g, 26.04 mmol, 1.5 equiv, 52 % purity) in dichloromethane (35 mL). After 12 h the reaction was diluted with a 1:1 mixture of sodium carbonate and sodium thiosulfate (60 mL). After separating the organic layer, the aqueous layer was extracted with chloroform (3 x 30 mL), dried over anhydrous sodium sulfate, and concentrated under reduced pressure to afford **4b** (2.14 g, 71 %) as red oil. –  $^1\text{H}$  NMR (500 MHz): 4.00 (3 H, s), 6.74 (1 H, d,  $J = 6.5$  Hz), 7.48 (1 H, dt,  $J = 1, 7$  Hz), 7.68 (1 H, dt,  $J = 1, 7$  Hz), 8.08 (1 H, d,  $J = 8.5$  Hz), 8.14 (1 H, dd,  $J = 1, 8.5$  Hz), 8.73 (1 H, d,  $J = 4.5$  Hz) ppm. –  $^{13}\text{C}$  NMR (125 MHz): 56.09, 121.96, 122.63, 126.15, 127.31, 128.27, 130.56, 131.13, 150.11, 163.42 ppm. – IR: 1156, 1394, 1507, 2999, 3125  $\text{cm}^{-1}$ .

#### Phenanthridine 5-oxide<sup>4a, 7</sup> (**4c**)

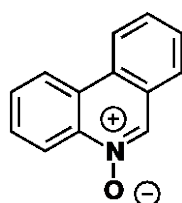

**4c** was prepared according to literature procedure.<sup>4a</sup> –  $^1\text{H}$  NMR (500 MHz): 7.25–8.09 (5 H, m), 8.53–8.63 (2 H, m), 8.97 (1 H, d,  $J = 2$  Hz), 9.19 (1 H, d,  $J = 2$  Hz) ppm. –  $^{13}\text{C}$  NMR (125 MHz): 120.67, 122.13, 122.77, 127.06, 128.18, 128.99, 129.53, 129.71, 129.91, 130.15, 130.46, 133.83, 169.27 ppm. – IR: 1071, 1191, 1473, 1559, 1647, 3071  $\text{cm}^{-1}$ .

### 8-Hydroxyquinoline 1-oxide<sup>4a,8</sup> (**4d**)

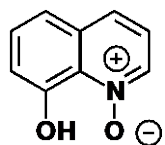

**4d** was prepared according to literature procedure.<sup>4a</sup> – <sup>1</sup>H NMR (300 MHz): 7.05 (1 H, d,  $J = 5.5$  Hz), 7.21–7.27 (2 H, m), 7.48 (1 H, t,  $J = 8.5$  Hz), 7.80 (1 H, d,  $J = 8.5$  Hz), 8.30 (1 H, dd,  $J = 0.5, 5.5$  Hz) ppm. – <sup>13</sup>C NMR (75 MHz): 115.06, 116.88, 120.41, 128.11, 130.07, 130.60, 134.76, 153.79, 168.71 ppm. – IR: 1047, 1153, 1201, 1312, 1436, 1598, 1698, 2950, 3066  $\text{cm}^{-1}$ .

### 4-Methylquinoline 1-oxide<sup>4a,9</sup> (**4e**)

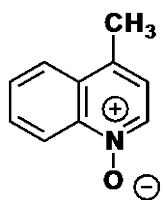

**4e** was prepared according to literature procedure.<sup>4a</sup> – <sup>1</sup>H NMR (500 MHz): 2.65 (3 H, s), 7.11 (1 H, d,  $J = 6$  Hz), 7.66 (1 H, t,  $J = 7$  Hz), 7.76 (1 H, t,  $J = 7$  Hz), 7.96 (1 H, d,  $J = 7$  Hz), 8.44 (1 H, d,  $J = 7$  Hz), 8.80 (1 H, t,  $J = 9$  Hz) ppm. – <sup>13</sup>C NMR (125 MHz): 18.38, 120.32, 121.41, 124.73, 128.51, 129.83, 130.18, 135.02, 135.11, 140.86 ppm. – IR: 1058, 1277, 1394, 1473, 1559, 1653, 2949, 3024, 3081  $\text{cm}^{-1}$ .

### 2-Phenylpyridine 1-oxide<sup>4a,10</sup> (**4f**)

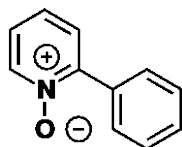

**4f** was prepared according to literature procedure.<sup>4a</sup> – m.p.: 150–152 °C<sup>11</sup> – <sup>1</sup>H NMR (300 MHz): 7.21–7.31 (2 H, m), 7.40–7.49 (4 H, m), 7.80 (2 H, dd,  $J = 2.5, 5.5$  Hz), 8.32 (1 H, d,  $J = 5.5$  Hz) ppm. – <sup>13</sup>C NMR (75 MHz): 124.51, 125.76, 127.38, 128.27, 129.25, 129.58, 132.59, 140.39, 149.25 ppm. – IR: 995, 1073, 1158, 1259, 1416, 1476, 2925, 3032  $\text{cm}^{-1}$ .

### 4,7-Dichloroquinoline 1-oxide<sup>4a,12</sup> (**4g**)

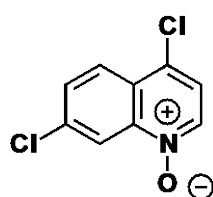

**4g** was prepared according to literature procedure.<sup>4a</sup> – m.p.: 164–165 °C<sup>13</sup>. – <sup>1</sup>H NMR (500 MHz): 7.36 (1 H, d, *J* = 6.5 Hz), 7.68 (1 H, d, *J* = 9 Hz), 8.13 (1 H, d, *J* = 9 Hz), 8.43 (1 H, d, *J* = 6.5 Hz), 8.77 (1 H, s) ppm. – <sup>13</sup>C NMR (125 MHz): 119.93, 121.22, 121.42, 125.60, 126.52, 126.75, 128.68, 129.85, 130.80, 135.96, 138.22, 142.33, 150.88 ppm. – IR: 829, 1091, 1291, 1367, 1412, 1555, 1609, 3025, 3094 cm<sup>-1</sup>.

### 7-Chloro-4-methoxyquinoline 1-oxide<sup>4a</sup> (**4h**)

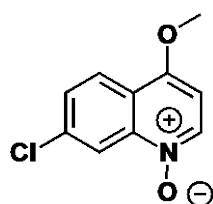

**S1** (1.6 g, 5.54 mmol) was reacted with *meta*-chloroperoxybenzoic acid (2.75 g, 8.31 mmol, 1.5 equiv, 52 % purity) in dichloromethane (10 mL). After 12 h the reaction was diluted with a 1:1 mixture of sodium carbonate and sodium thiosulfate (30 mL). After separating the organic layer, the aqueous layer was extracted with chloroform (3 x 15 mL), dried over anhydrous sodium sulfate, and concentrated under reduced pressure to afford **4h** (1.12 g, 97 %) as colorless solid. – m.p.: 145–147 °C<sup>4a</sup>. – <sup>1</sup>H NMR (500 MHz): 4.06 (3 H, s), 6.64 (1 H, d, *J* = 7 Hz), 7.59 (1 H, d, *J* = 2 Hz), 8.15 (1 H, d, *J* = 9 Hz), 8.46 (1 H, d, *J* = 7 Hz), 8.77 (1 H, d, *J* = 2 Hz) ppm. – <sup>13</sup>C NMR (125 MHz): 56.34, 99.84, 119.57, 120.99, 123.39, 124.28, 129.06, 136.99, 137.88, 154.26 ppm. – IR: 1082, 1168, 1265, 1345, 1522, 2835, 3026 cm<sup>-1</sup>. – MS (ESI): found 212.9, MS (HRMS): calc. 210.0316, found 213.9937 [M + H<sup>+</sup>].

### 6-Bromoquinoline 1-oxide<sup>4a,6</sup> (**4j**)

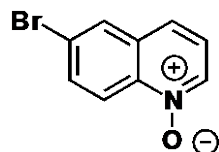

**4j** was prepared according to literature procedure.<sup>4a</sup> – <sup>1</sup>H NMR (300 MHz): 7.31 (1 H, dd, *J* = 1, 2.5 Hz), 7.63 (1 H, d, *J* = 8.5 Hz), 7.79 (1

H, dd,  $J = 2, 9.5$  Hz), 8.02 (1 H, d,  $J = 2$  Hz), 8.52 (1 H, d,  $J = 6$  Hz), 6.60 (1 H, d,  $J = 9.5$  Hz) ppm. –  $^{13}\text{C}$  NMR (75 MHz): 121.72, 122.19, 123.29, 124.98, 130.08, 131.57, 133.83, 135.90, 140.25 ppm. – IR: 1143, 1266, 1421, 1569, 2999, 3026  $\text{cm}^{-1}$ .

### Pyrazine 1-oxide<sup>4a,14</sup> (**4k**)

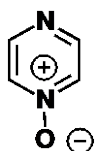

**4k** was prepared according to literature procedure.<sup>14b</sup>

### Quinoxaline 1-oxide<sup>15</sup> (**4l**)

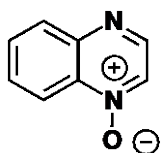

Quinoxaline (200 mg, 1.53 mmol) was reacted *meta*-chloroperoxybenzoic acid (759 mg, 2.29 mmol, 1.5 equiv, 52 % purity) in dichloromethane (3 mL). The isolated product afforded **4l** (210 mg, 94 %) as a red solid – m.p.: 152–155 °C<sup>16</sup> –  $^1\text{H}$  NMR (300 MHz): 7.33 (2 H, d,  $J = 6.5$  Hz), 8.18 (2 H, d,  $J = 5.5$  Hz), 8.45 (2 H, s) ppm. –  $^{13}\text{C}$  NMR (75 MHz): 124.70, 125.86, 126.90, 129.37, 135.10, 137.58, 140.36, 149.90 ppm. – IR: 1000, 1169, 1305, 1457, 1565, 2990, 3269  $\text{cm}^{-1}$ .

### General Procedure 1 (GP1) for the synthesis of 5ah–16a:

To a solution of *N*-oxide (1 mmol, 1 equiv) in diethyl ether (5 mL) was added copper(I) chloride (5 mol %), magnesium chloride (1.5–4 equiv) and a Grignard reagent (2–4 equiv). The reaction was allowed to stir for 12 h at 23 °C before being neutralized with a saturated aqueous solution of ammonium chloride (20 mL) and the aqueous layer extracted with chloroform (3 x 20 mL). The combined organic fractions were dried over

anhydrous sodium sulfate and concentrated under reduced pressure. The resulting oil was purified by column chromatography [hexanes/EtOAc] to give the desired product.

### 2-(4-Fluorophenyl)-4-methylquinoline<sup>20</sup> (**5ea**)

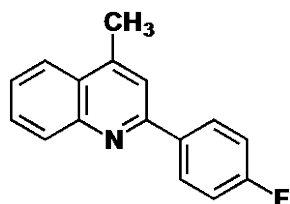

According to GP1, **4e** (82 mg, 0.517 mmol) was reacted with copper(I) chloride (5 mg, 0.051 mmol, 10 mol %), magnesium chloride (77 mg, 0.775 mmol, 1.5 equiv), and (4-fluorophenyl)magnesium bromide (2.06 mL, 1.03 mmol, 2 equiv, 0.5M in tetrahydrofuran) in diethyl ether (2.5 mL). The crude product was purified by column chromatography to yield **5ea** (98 mg, 80 %) as yellow oil. – <sup>1</sup>H NMR (300 MHz): 2.76 (3 H, s), 7.17–7.26 (2 H, m), 7.55 (1 H, dt, *J* = 1, 6 Hz), 7.66 (1 H, s), 7.72 (1 H, dt, *J* = 1.5, 7 Hz), 7.99 (1 H, dd, *J* = 1, 8 Hz), 8.12–8.17 (3 H, m) ppm. – <sup>13</sup>C NMR (75 MHz): 19.04, 115.68 (d, *J* = 21 Hz), 119.39, 123.61, 126.07, 127.13, 129.36 (d, *J* = 12.5 Hz), 130.14, 135.90 (d, *J* = 2.5 Hz), 144.99, 148.01, 155.93, 162.04, 165.34 ppm. – IR: 1432, 1496, 1569, 1597, 2945, 3026 cm<sup>-1</sup>.

### 2-Benzyl-4-methoxyquinoline (**5bf**)

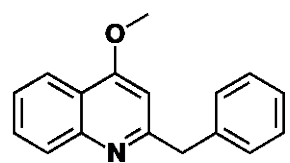

According to GP1, **4b** (70 mg, 0.4 mmol) was reacted with copper(I) chloride (4 mg, 0.04 mmol, 10 mol %), magnesium chloride (80 mg, 0.80 mmol, 2 equiv), and benzylmagnesium bromide (800 μL, 0.80 mmol, 2 equiv, 1M in tetrahydrofuran) in diethyl ether (2 mL). The crude product was purified by column chromatography to yield **5bf** (60 mg, 61 %) as yellow oil. – <sup>1</sup>H NMR (500 MHz): 3.93 (3 H, s), 4.72 (2 H, s), 6.56 (1 H, s), 7.24–7.49 (6 H, m), 7.70 (1 H, dt, *J* = 1, 8 Hz), 8.04 (1 H, d, *J* = 8.5 Hz), 8.14 (1 H, d, *J* = 8.5 Hz) ppm. – <sup>13</sup>C NMR (125 MHz): 45.99, 55.34, 100.12, 120.13, 121.65, 125.15, 126.48, 127.58, 128.33, 129.14, 129.87, 139.26, 148.59, 162.37, 162.63 ppm. –



IR: 1113, 1233, 1362, 1446, 1569, 1619, 2867, 2957, 3049  $\text{cm}^{-1}$ . – MS (ESI): 249.8, calcd: 250.1226, found: 249.8008 [M].

### 6-Phenylphenanthridine<sup>17a</sup> (**5cd**)

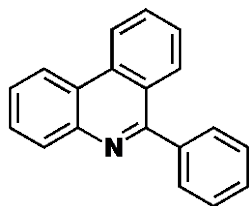

According to GP1, **4c** (234 mg, 1.30 mmol) was reacted with copper(I) chloride (13 mg, 0.13 mmol, 10 mol %), magnesium chloride (193 mg, 1.95 mmol, 1.5 equiv), and phenylmagnesium chloride (1.3 mL, 2.6 mmol, 2 equiv, 2M in tetrahydrofuran) in diethyl ether (6.5 mL). The crude product was purified by column chromatography to yield **5cd** (208 mg, 68 %) as yellow oil. – <sup>1</sup>H NMR (300 MHz): 6.66–6.90 (2 H, m), 7.13–7.42 (3 H, m), 7.48–7.91 (4 H, m), 8.12 (1 H, d, *J* = 8 Hz), 8.29 (1 H, dd, *J* = 1.5, 8 Hz), 8.64 (1 H, dd, *J* = 1.5, 8 Hz), 8.72 (1 H, d, *J* = 8 Hz) ppm. – <sup>13</sup>C NMR (75 MHz): 115.42, 120.16, 121.98, 122.21, 127.05, 127.83, 128.11, 128.44, 128.98, 129.48, 130.03, 130.74, 133.49, 139.40, 146.22, 156.04, 161.40 ppm. – IR: 1082, 1147, 1313, 1329, 1402, 1446, 1520, 3049  $\text{cm}^{-1}$ .

### 2-Cyclopropylquinolin-8-ol (**5dc**)

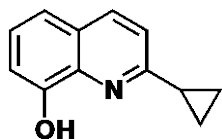

According to GP1, **4d** (28 mg, 0.177 mmol) was reacted with copper(I) chloride (2 mg, 0.017 mmol, 10 mol %), magnesium chloride (26 mg, 0.265 mmol, 1.5 equiv), and cyclopropylmagnesium chloride (1.4 mL, 0.708 mmol, 4 equiv, 0.5M in tetrahydrofuran) in diethyl ether (1 mL). The crude product was purified by column chromatography to yield **5dc** (27 mg, 84 %) as yellow oil. – <sup>1</sup>H NMR (500 MHz): 1.09–1.13 (2 H, m), 1.18–1.21 (2 H, m), 2.17–2.23 (1 H, m), 7.11 (1 H, dd, *J* = 1, 7.5 Hz), 7.26 (1 H, dd, *J* = 1 H, 8.5 Hz), 7.30–7.35 (2 H, m), 7.99 (1 H, d, *J* = 8.5 Hz) 8.04–8.22 (1 H, br s) ppm. – <sup>13</sup>C NMR (75 MHz): 11.19, 17.53, 109.67, 117.61, 121.31, 126.10, 126.72, 135.80, 137.62, 151.32, 161.49 ppm. – IR: 1238, 1318, 1474,

1572, 1697, 2913, 2999, 3034  $\text{cm}^{-1}$ . – MS (ESI): 186.7, HRMS: calcd: 186.0913; found 186.0285  $[\text{M} + \text{H}^+]$ .

### 2-(4-Methoxyphenyl)quinoxaline<sup>25</sup> (5lo)

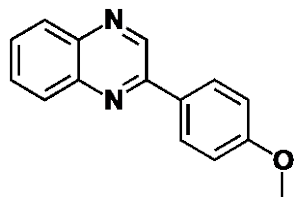

According to GP1, **4I** (26 mg, 0.177 mmol) was reacted with copper(I) chloride (1 mg, 0.008 mmol, 5 mol %), magnesium chloride (26 mg, 0.265 mmol, 1.5 equiv), and (4-methoxyphenyl)magnesium iodide (177  $\mu\text{L}$ , 0.344 mmol, 2 equiv, 2M in tetrahydrofuran) in diethyl ether (1 mL). The crude product was purified by column chromatography to yield **5lo** (33 mg, 79 %) as brown oil. –  $^1\text{H}$  NMR (500 MHz): 3.87 (3 H, s), 7.03 (2 H, d,  $J = 15$  Hz), 7.51 (1 H, d,  $J = 14.5$  Hz), 7.61 (1 H, td,  $J = 2.5, 2.5, 12$  Hz), 7.71–7.85 (2 H, m), 8.02 (2 H, d,  $J = 15$  Hz), 8.85 (1 H, d,  $J = 14.5$  Hz) ppm. –  $^{13}\text{C}$  NMR (125 MHz): 55.39, 113.67, 120.18, 123.08, 125.22, 127.89, 128.13, 129.23, 130.48, 131.20, 142.30, 144.65, 160.47 ppm. – IR: 1030, 1113, 1167, 1240, 1362, 1426, 1508, 2835, 3000, 3340  $\text{cm}^{-1}$ .

### 2-Cyclopentyl-6-phenylpyridine (5fe)

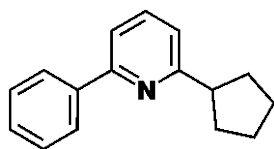

According to GP1, **4f** (25 mg, 0.177 mmol) was reacted with copper(I) chloride (2 mg, 0.018 mmol, 10 mol %), magnesium chloride (26 mg, 0.26 mmol, 1.5 equiv), and cyclopentylmagnesium chloride (177  $\mu\text{L}$ , 0.354 mmol, 2 equiv, 2M in diethyl ether) in diethyl ether (1 mL). The crude product was purified by column chromatography to yield **5fe** (26 mg, 67 %) as yellow oil. –  $^1\text{H}$  NMR (500 MHz): 1.69–2.15 (8 H, m), 3.26 (1 H, quint,  $J = 5$  Hz), 7.10 (1 H, dd,  $J = 1, 8$  Hz), 7.39 (1 H, td,  $J = 1, 2.5, 2.5$  Hz), 7.44–7.48 (2 H, m), 7.52 (1 H, dd,  $J = 1, 8$  Hz), 7.64 (1 H, t,  $J = 2.5$  Hz), 8.04 (2 H, dd,  $J = 1.5, 8.5$  Hz) ppm. –  $^{13}\text{C}$  NMR (125 MHz): 25.87, 33.57, 48.04, 117.42, 119.95, 126.89, 128.32, 128.58, 136.68, 139.89, 156.28, 165.61 ppm. – IR: 991, 1164,

1259, 1445, 1590, 2866, 2952, 3060  $\text{cm}^{-1}$ . – MS (ESI): 223.9, HRMS: calcd: 224.1434; found 224.1553  $[\text{M} + \text{H}^+]$ .

### 4,7-Dichloro-2-methylquinoline<sup>22</sup> (5gb)

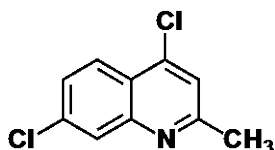

According to GP1, **4g** (43 mg, 0.20 mmol) was reacted with copper(I) chloride (2 mg, 0.02 mmol, 10 mol %), magnesium chloride (30 mg, 0.30 mmol, 1.5 equiv), and methylmagnesium bromide (800  $\mu\text{L}$ , 0.40 mmol, 2 equiv, 0.5M in tetrahydrofuran) in diethyl ether (1 mL). The crude product was purified by column chromatography to yield **5gb** (27 mg, 64 %) as yellow oil. –  $^1\text{H}$  NMR (500 MHz): 2.72 (3 H, s), 7.53 (1 H, d,  $J = 5.5$  Hz), 8.03 (2 H, s), 8.11 (1 H, d,  $J = 5.5$  Hz) ppm. –  $^{13}\text{C}$  NMR (75 MHz): 25.17, 122.10, 123.22, 125.32, 127.61, 127.97, 136.39, 142.45, 149.00, 160.26 ppm. – IR: 1176, 1318, 1445, 1551, 1609, 2924, 3083  $\text{cm}^{-1}$ .

### 2-(4-Chlorophenyl)-6-phenylpyridine 5fg

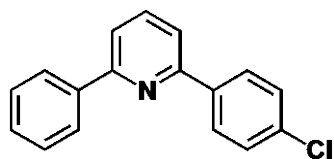

According to GP1, **4f** (30 mg, 0.177 mmol) was reacted with copper(I) chloride (2 mg, 0.017 mmol, 10 mol %), magnesium chloride (26 mg, 0.265 mmol, 1.5 equiv), and (4-chlorophenyl)magnesium chloride (344  $\mu\text{L}$ , 0.354 mmol, 2 equiv, 1M in diethyl ether) in diethyl ether (1 mL). The crude product was purified by column chromatography to yield **5fg** (28 mg, 61 %) as colorless oil. –  $^1\text{H}$  NMR (300 MHz): 7.42–7.54 (5 H, m), 7.65–7.76 (3 H, m), 7.82 (1 H, t,  $J = 7.5$  Hz), 8.13 (3 H, dt,  $J = 1.5, 8.5$  Hz) ppm. –  $^{13}\text{C}$  NMR (75 MHz): 118.38, 118.90, 126.94, 128.22, 128.32, 128.71, 128.84, 129.09, 135.05, 137.61, 137.86, 139.25, 155.55, 156.93 ppm. – IR: 1057, 1110, 1179, 1321, 1417, 1541, 1607, 2924, 3020, 3086  $\text{cm}^{-1}$ . – MS (ESI): 264.7, HRMS: calcd: 265.0658; found 265.2267  $[\text{M} + \text{H}^+]$ .

### 2-(*o*-Tolyl)quinolone<sup>17</sup> (**5ah**)

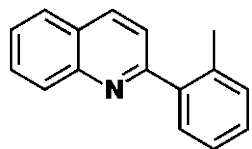

According to GP1, **1** (300 mg, 2.06 mmol) was reacted with copper(I) chloride (20 mg, 0.206 mmol, 10 mol %), lithium fluoride (77 mg, 3.09, 1.5 equiv), and *o*-tolymagnesium chloride (3 mL, 4.12 mmol, 2 equiv, 1.4M in tetrahydrofuran/diethyl ether) in diethyl ether (10 mL). The crude product was purified by column chromatography to yield **5ah** (275 mg, 61 %) as yellow solid. – <sup>1</sup>H NMR (300 MHz): 2.46 (3 H, s), 7.36–7.39 (3 H, m), 7.54–7.63 (3 H, m), 7.77–7.81 (1 H, m), 7.90–7.92 (1 H, m), 8.20–8.22 (1 H, m) ppm. – <sup>13</sup>C NMR (300 MHz): 20.42, 120.34, 122.54, 126.08, 126.53, 127.51, 128.42, 128.65, 129.82, 130.76, 130.91, 136.36, 140.53, 137.72, 160.29 ppm. – IR: 1025, 1145, 1378, 1431, 1552, 1592, 2947, 3026 cm<sup>-1</sup>.

### 7-Chloro-2-isopropyl-4-methoxyquinoline (**5hi**)

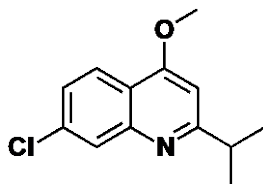

According to GP1, **4h** (42 mg, 0.20 mmol) was reacted with copper(I) chloride (2 mg, 0.02 mmol, 10 mol %), magnesium chloride (30 mg, 0.30 mmol, 1.5 equiv), and cyclopropylmagnesium bromide (800 μL, 0.40 mmol, 2 equiv, 0.5M in tetrahydrofuran) in diethyl ether (1 mL). The crude product was purified by column chromatography to yield **5hi** (28 mg, 60 %) as yellow oil. – <sup>1</sup>H NMR (500 MHz): 1.39 (6 H, d, *J* = 7 Hz), 3.15–3.22 (1 H, m), 4.05 (3 H, s), 6.65 (1 H, s), 7.38 (1 H, d, *J* = 8.5 Hz), 7.99 (1 H, s), 8.06 (1 H, d, *J* = 8.5 Hz) ppm. – <sup>13</sup>C NMR (125 MHz): 22.48, 37.77, 55.57, 97.85, 118.65, 123.10, 125.64, 127.45, 135.54, 149.14, 162.53, 170.38 ppm. – IR: 993, 1118, 1196, 1294, 1328, 1417, 1502, 1614, 2868, 2961 cm<sup>-1</sup>. – MS (ESI): 236.0868, calcd: 236.0837, found: 238.8 [M + H<sup>+</sup>].

## 2-Phenyl-6-(4-(trifluoromethyl)phenyl)pyridine (5fn)

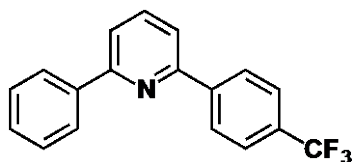

According to GP1, **4f** (70 mg, 0.41 mmol) was reacted with copper(I) chloride (4 mg, 0.041 mmol, 10 mol %), magnesium chloride (81 mg, 0.81 mmol, 2 equiv), and (4-(trifluoromethyl)phenyl)magnesium bromide (810  $\mu$ L, 0.81 mmol, 2 equiv, 1M in diethyl ether) in diethyl ether (2 mL). The crude product was purified by column chromatography to yield **5fn** (81 mg, 66 %) as colorless oil. –  $^1\text{H}$  NMR (500 MHz): 7.47–7.49 (1 H, m), 7.53 (2 H, td,  $J = 1.5, 6$  Hz), 7.74–7.89 (4 H, m), 7.89 (1 H, t,  $J = 8$  Hz), 8.15–8.17 (2 H, m), 8.28 (2 H, d,  $J = 8$  Hz) ppm. –  $^{13}\text{C}$  NMR (75 MHz): 118.97, 119.50, 125.62 (quart.,  $J = 12.5$  Hz), 126.96, 127.23, 128.33, 128.77, 129.22, 137.75, 139.08, 142.73, 155.25, 157.12 ppm. –  $^{19}\text{F}$  NMR (252 MHz): -62.51 ppm. – IR: 1016, 1171, 1269, 1313, 1419, 1575, 2899, 2957, 3053  $\text{cm}^{-1}$ . – MS (ESI): 299.9, calcd: 300.0995, found: 300.0869 [ $\text{M} + \text{H}^+$ ].

## 1-Isopropylisoquinoline<sup>23</sup> (5ii)

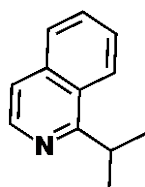

According to GP1, **4i** (25 mg, 0.177 mmol) was reacted with copper(I) chloride (1 mg, 0.008 mmol, 5 mol %), magnesium chloride (53 mg, 0.531 mmol, 3 equiv), and isopropylmagnesium chloride (350  $\mu$ L, 0.708 mmol, 4 equiv, 2M in diethyl ether) in diethyl ether (1 mL). The crude product was purified by column chromatography to yield **5ii** (22 mg, 73 %) as yellow oil. –  $^1\text{H}$  NMR (500 MHz): 1.56 (6 H, d,  $J = 6.5$  Hz), 7.07 (1 H, sept,  $J = 6.5$  Hz), 7.43 (1 H, d,  $J = 8$  Hz), 7.51 (1 H, dt,  $J = 1.5, 7$  Hz), 7.61 (1 H, dt,  $J = 1.5, 7$  Hz), 8.35 (1 H, d,  $J = 8.5$  Hz), 8.51 (1 H, s) ppm. –  $^{13}\text{C}$  NMR (125 MHz): 22.26, 31.13, 114.08, 120.99, 124.97, 126.15, 126.92, 129.76, 142.02, 153.38, 159.25 ppm. – IR: 1025, 1113, 1435, 1565, 2829, 3025  $\text{cm}^{-1}$ .

### 1-Phenylisoquinoline<sup>17a</sup> (**5id**)

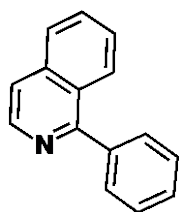

According to GP1, **4i** (120 mg, 0.827 mmol) was reacted with copper(I) chloride (8 mg, 0.083 mmol, 10 mol %), lithium fluoride (31 mg, 1.25 mmol, 1.5 equiv), and phenylmagnesium bromide (515  $\mu$ L, 1.65 mmol, 2 equiv, 3.2M in diethyl ether) in diethyl ether (4 mL). The crude product was purified by column chromatography to yield **5id** (97 mg, 57 %) as yellow oil. – <sup>1</sup>H NMR (300 MHz): 7.49–7.57 (4 H, m), 7.65–7.73 (4 H, m), 7.89 (1 H, dd,  $J$  = 0.5, 8.5 Hz), 8.11 (1 H, dd,  $J$  = 0.5, 8.5 Hz), 8.61 (1 H, d,  $J$  = 5.5 Hz) ppm. – <sup>13</sup>C NMR (75 MHz): 119.94, 126.98, 127.17, 127.58, 128.30, 128.33, 128.58, 129.89, 130.03, 136.83, 139.48, 140.71, 142.14 ppm. – IR: 1030, 1211, 1386, 144, 1583, 1632, 2925, 3052  $\text{cm}^{-1}$ .

### 4-Methoxy-2-phenethylquinoline<sup>18</sup> (**5bj**)

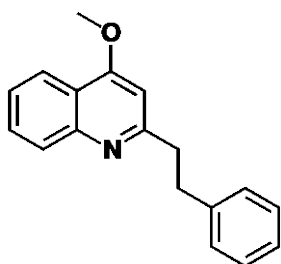

According to GP1, **4b** (70 mg, 0.397 mmol) was reacted with copper(I) chloride (4 mg, 0.039 mmol, 10 mol %), magnesium chloride (80 mg, 0.80 mmol, 2 equiv), and phenethylmagnesium chloride (800  $\mu$ L, 0.80 mmol, 2 equiv, 1M in tetrahydrofuran) in diethyl ether (2 mL). The crude product was purified by column chromatography to yield **5bj** (53 mg, 51 %) as yellow oil. – <sup>1</sup>H NMR (500 MHz): 3.15–3.27 (4 H, m), 3.96 (3 H, s), 6.50 (1 H, s), 7.19–7.34 (5 H, m), 7.46 (1 H, td,  $J$  = 1, 7 Hz), 7.69 (1 H, td,  $J$  = 1.5, 7 Hz), 8.02 (1 H, d,  $J$  = 8.5 Hz), 8.15 (1 H, dd,  $J$  = 1, 8.5 Hz) ppm. – <sup>13</sup>C NMR (125 MHz): 36.01, 41.57, 55.50, 100.25, 120.08, 121.61, 124.90, 125.98, 128.27, 128.56, 128.60, 129.72, 141.57, 148.82, 162.24, 162.94 ppm. – IR: 968, 1112, 1236, 1432, 1508, 1620, 2849, 2930, 3026  $\text{cm}^{-1}$ .

### 7-Chloro-2-cyclopropyl-4-methoxyquinoline (5hc)

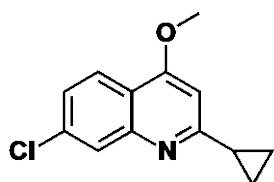

According to GP1, **4h** (42 mg, 0.20 mmol) was reacted with copper(I) chloride (2 mg, 0.02 mmol, 10 mol %), magnesium chloride (30 mg, 0.30 mmol, 1.5 equiv), and cyclopropylmagnesium bromide (800  $\mu$ L, 0.40 mmol, 2 equiv, 0.5M in tetrahydrofuran) in diethyl ether (1 mL). The crude product was purified by column chromatography to yield **5hc** (32 mg, 68 %) as yellow oil. –  $^1\text{H}$  NMR (500 MHz): 0.85–1.45 (4 H, m), 1.89–2.18 (1 H, m), 4.05 (3 H, s), 6.64 (1 H, s), 7.38 (1 H, d,  $J = 8.5$  Hz), 7.99 (1 H, s), 8.07 (1 H, d,  $J = 8.5$  Hz) ppm. –  $^{13}\text{C}$  NMR (125 MHz): 25.95, 33.48, 49.31, 55.57, 98.80, 118.64, 123.08, 125.58, 127.45, 135.50, 149.12, 162.32, 168.84 ppm. – IR: 906, 1072, 1161, 1237, 1342, 1429, 1550, 1607, 3037, 3094  $\text{cm}^{-1}$ . – MS (ESI): 234.6, calcd: 234.0680, found: 234.0370 [ $\text{M} + \text{H}^+$ ].

### 4-Methoxy-2-(prop-1-en-2-yl)quinoline (5bk)

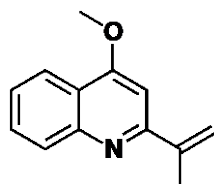

According to GP1, **4b** (28 mg, 0.159 mmol) was reacted with copper(I) chloride (2 mg, 0.016 mmol, 10 mol %), magnesium chloride (24 mg, 0.238 mmol, 1.5 equiv), and isopropenylmagnesium bromide (650  $\mu$ L, 0.318 mmol, 2 equiv, 0.5M in tetrahydrofuran) in diethyl ether (1 mL). The crude product was purified by column chromatography to yield **5bk** (22 mg, 71 %) as yellow oil. –  $^1\text{H}$  NMR (300 MHz): 2.34 (3 H, s), 4.07 (3 H, s), 5.45 (1 H, s), 5.85 (1 H, s), 6.98 (1 H, s), 7.45 (1 H, td,  $J = 1.5, 11.5$  Hz), 7.66 (1 H, td,  $J = 2, 11.5$  Hz), 8.02 (1 H, d,  $J = 14$  Hz), 8.15 (1 H, d,  $J = 14$  Hz) ppm. –  $^{13}\text{C}$  NMR (75 MHz): 20.74, 55.49, 96.98, 116.59, 120.47, 121.47, 125.31, 129.08, 130.04, 145.00, 148.56, 159.89, 162.27 ppm. – IR: 1107, 1236, 1377, 1449, 1557, 1617, 2909, 2970, 3042  $\text{cm}^{-1}$ . – MS (ESI): 200.0, HRMS: calcd: 200.1070, found: 200.1096 [ $\text{M} + \text{H}^+$ ].

### 6-Bromo-2-pentylquinoline<sup>24</sup> (**5jl**)

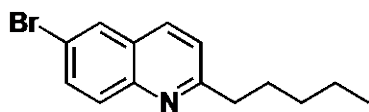

According to GP1, **4j** (40 mg, 0.177 mmol) was reacted with copper(I) chloride (2 mg, 0.018 mmol, 10 mol %), magnesium chloride (26 mg, 0.26 mmol, 1.5 equiv), and pentylmagnesium bromide (177  $\mu$ L, 0.354 mmol, 2 equiv, 2M in diethyl ether) in diethyl ether (1 mL). The crude product was purified by column chromatography to yield **5jl** (38 mg, 78 %) as brown oil. – <sup>1</sup>H NMR (500 MHz): 0.90 (3 H, t,  $J$  = 2.5 Hz), 1.35–1.38 (4 H, m), 1.80 (2 H, quint,  $J$  = 7.5 Hz), 2.94 (2 H, t,  $J$  = 8 Hz), 7.30 (1 H, d,  $J$  = 8.5 Hz), 7.73 (1 H, dd,  $J$  = 2.5, 9 Hz), 7.89–7.97 (3 H, m) ppm. – <sup>13</sup>C NMR (125 MHz): 14.01, 22.54, 29.58, 31.71, 39.30, 118.28, 122.21, 127.82, 129.47, 130.59, 132.67, 135.10, 146.47, 163.62 ppm. – IR: 1059, 1119, 1300, 1386, 1487, 1556, 2855, 2924, 3050  $\text{cm}^{-1}$ .

### 2-(4-(Trifluoromethyl)phenyl)pyrazine (**5kn**)

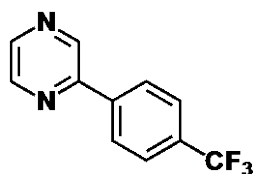

According to GP1, **4k** (40 mg, 0.41 mmol) was reacted with copper(I) chloride (4 mg, 0.04 mmol, 10 mol %), magnesium chloride (81 mg, 0.82 mmol, 2 equiv), and (4-(trifluoromethyl)phenyl)-magnesium bromide (820  $\mu$ L, 0.82 mmol, 2 equiv, 1M in diethyl ether) in diethyl ether (2 mL). The crude product was purified by column chromatography to yield **5kn** (62 mg, 61 %) as brown oil. – <sup>1</sup>H NMR (300 MHz): 7.78 (2 H, dd,  $J$  = 1, 9 Hz), 8.14 (2 H, dd,  $J$  = 1, 9 Hz), 8.59 (1 H, d,  $J$  = 2.5 Hz), 8.68 (1 H, dd,  $J$  = 1.5, 2.5 Hz), 9.07 (1 H, d,  $J$  = 1.5 Hz) ppm. – <sup>13</sup>C NMR (75 MHz): 125.97, 126.02, 126.06, 127.23, 127.36, 142.30, 143.83, 144.41, 151.30 ppm. – <sup>19</sup>F NMR (252 MHz): –62.76 ppm. – IR: 1016, 1131, 1170, 1325, 1419, 3003, 3028, 3113  $\text{cm}^{-1}$ . – MS (ESI): 226.0, calcd: 225.0634, found: 226.0895 [M + H<sup>+</sup>].



## 2-Isobutyl-4-methoxyquinoline (5bm)

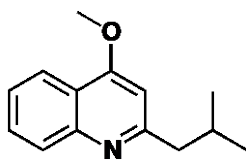

According to GP1, **4b** (16 mg, 0.091 mmol) was reacted with copper(I) chloride (1 mg, 0.009 mmol, 10 mol %), magnesium chloride (13 mg, 0.136 mmol, 1.5 equiv), and isobutylmagnesium chloride (90  $\mu$ L, 0.182 mmol, 2 equiv, 2M in diethyl ether) in diethyl ether (500  $\mu$ L). The crude product was purified by column chromatography to yield **5bm** (15 mg, 79 %) as yellow oil. –  $^1\text{H}$  NMR (500 MHz): 1.00 (6 H, d,  $J = 6$  Hz), 2.18–2.29 (1 H, m), 2.81 (2 H, d,  $J = 7.5$  Hz), 4.05 (3 H, s), 6.62 (1 H, s), 7.45 (1 H, td,  $J = 1, 7$  Hz), 7.67 (1 H, td,  $J = 1.5, 7$  Hz), 7.99 (1 H, d,  $J = 8$  Hz), 8.15 (1 H, dd,  $J = 1, 8$  Hz) ppm. –  $^{13}\text{C}$  NMR (125 MHz): 22.59, 29.45, 38.92, 55.55, 100.51, 109.98, 119.99, 121.55, 124.79, 128.28, 128.33, 129.65, 163.37 ppm. – IR: 1078, 1225, 1309, 1365, 1455, 1653, 2986, 2970, 3125  $\text{cm}^{-1}$ . – MS (ESI): 216.0, HRMS: calcd: 216.1383, found: 216.1416  $[\text{M} + \text{H}^+]$ .

## 2-Phenylquinolin-8-ol<sup>19</sup> (5dd)

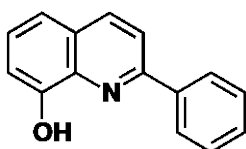

According to GP1, **4d** (300 mg, 1.86 mmol) was reacted with copper(I) chloride (18 mg, 0.186 mmol, 10 mol %), magnesium chloride (736 mg, 7.44 mmol, 4 equiv), and phenylmagnesium chloride (3.7 mL, 7.44 mmol, 4 equiv, 2M in tetrahydrofuran) in diethyl ether (9 mL). The crude product was purified by column chromatography to yield **5dd** (288 mg, 71 %) as brown oil. –  $^1\text{H}$  NMR (300 MHz): 7.19–7.58 (6 H, m), 7.93 (1 H, d,  $J = 8.5$  Hz), 8.16 (2 H, d,  $J = 7$  Hz), 8.23 (1 H, d,  $J = 8.5$  Hz) 8.30–8.44 (1 H, br s) ppm. –  $^{13}\text{C}$  NMR (75 MHz): 110.15, 117.62, 119.60, 126.55, 127.38, 127.63, 128.68, 128.88, 129.59, 129.72, 130.03, 136.99, 152.26 ppm. – IR: 1203, 1290, 1403, 1447, 1510, 1660, 3052  $\text{cm}^{-1}$ .

## 2-Methyl-6-phenylpyridine<sup>21</sup> (5fb)

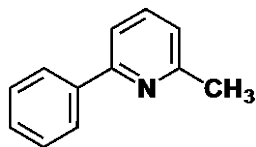

According to GP1, **4f** (25 mg, 0.177 mmol) was reacted with copper(I) chloride (2 mg, 0.018 mmol, 10 mol %), magnesium chloride (53 mg, 0.53 mmol, 3 equiv), and phenylmagnesium bromide (221  $\mu$ L, 0.708 mmol, 4 equiv, 3.2M in diethyl ether) in ether (1 mL). The crude product was purified by column chromatography to yield **5fb** (22 mg, 76 %) as yellow oil. – <sup>1</sup>H NMR (500 MHz): 2.64 (3 H, s), 7.10 (1 H, d,  $J = 7.5$  Hz), 7.40 (1 H, d,  $J = 7.5$  Hz), 7.45–7.50 (3 H, m), 7.51 (1 H, dd,  $J = 1, 8$  Hz), 7.64 (1 H, t,  $J = 7.5$  Hz), 7.98 (1 H, dd,  $J = 1, 8$  Hz) ppm. – <sup>13</sup>C NMR (125 MHz): 24.77, 117.61, 121.57, 126.98, 128.31, 128.66, 136.85, 139.78, 156.97, 158.35 ppm. – IR: 921, 1098, 1232, 1444, 1570, 2851, 2921, 3059  $\text{cm}^{-1}$ .

## (1*S*,2*S*,4*R*,5*S*)-2-((*R*)-(Benzyloxy)(2-isopropylquinolin-4-yl)methyl)-5-ethylquinuclidine (6a)

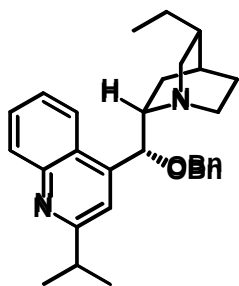

According to GP1, **7** (91 mg, 0.228 mmol) was reacted with copper(I) chloride (2 mg, 0.02 mmol, 10 mol %), magnesium chloride (46 mg, 0.46 mmol, 3 equiv), and isopropylmagnesium chloride (912  $\mu$ L, 0.912 mmol, 4 equiv, 1M in tetrahydrofuran) in diethyl ether (1 mL). The crude product was purified by column chromatography to yield **6a** (63 mg, 65 %) as brown oil. – <sup>1</sup>H NMR (300 MHz): 0.82 (3 H, t,  $J = 7.5$  Hz), 1.20–1.27 (4 H, m), 1.39 (3 H, d,  $J = 2$  Hz), 1.41 (3 H, d,  $J = 2$  Hz), 1.98–2.07 (3 H, m), 2.14–2.21 (2 H, m), 2.73–2.80 (1 H, m), 3.02–3.15 (1 H, m), 3.21–3.49 (3 H, m), 3.97–4.11 (1 H, m), 4.48 (1 H, d,  $J = 10.5$  Hz), 4.70 (1 H, d,  $J = 10.5$  Hz), 6.34–6.46 (1 H, m), 7.60–7.78 (8 H, m), 8.12 (1 H, dd,  $J = 1, 8.5$  Hz), 8.56 (1 H, dd,  $J = 0.5, 7.5$  Hz) ppm. – <sup>13</sup>C NMR (125 MHz): 11.54, 22.44, 22.67, 24.92, 25.39, 27.01, 29.71, 35.74, 37.38, 43.87, 57.06, 60.09, 71.82, 123.47, 124.44, 127.17, 128.07, 128.14, 128.23, 128.72, 129.68, 129.85, 136.97, 143.12, 148.19, 167.09 ppm. – IR: 1056, 1123, 1453, 1554, 2867, 3026  $\text{cm}^{-1}$ . – MS (ESI): 429.3, calcd: 429.2900, found: 429.2571 [ $M + H^+$ ].

**(1*S*,2*S*,4*R*,5*S*)-2-((*R*)-(Benzyloxy)(2-phenylquinolin-4-yl)methyl)-5-ethylquinuclidine<sup>26</sup> (**6b**)**

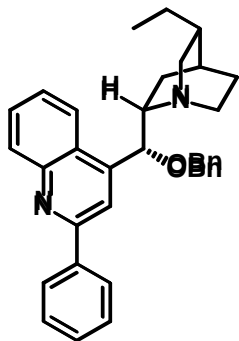

According to GP1, **7**<sup>4a,14a,26</sup> (91 mg, 0.228 mmol) was reacted with copper(I) chloride (2 mg, 0.02, 10 mol %), magnesium chloride (46 mg, 0.46 mmol, 3 equiv), and phenylmagnesium bromide (304  $\mu$ L, 0.912 mmol, 4 equiv, 3.2M in diethyl ether) in diethyl ether (1 mL). The crude product was purified by column chromatography to yield **6b** (60 mg, 37 %) as brown oil. – <sup>1</sup>H NMR (300 MHz): 0.80 (3 H, t,  $J$  = 7 Hz), 1.19–1.90 (3 H, m), 2.55–3.79 (3 H, m), 4.59 (2 H, quart,  $J$  = 11 Hz), 7.24–7.56 (8 H, m), 7.65 (1 H, dt,  $J$  = 1, 8 Hz), 7.78 (1 H, t,  $J$  = 7 Hz), 8.04 (1 H, s), 8.13 (2 H, dd,  $J$  = 1.5, 8.5 Hz), 8.24 (1 H, d,  $J$  = 8.5 Hz), 8.42 (1 H, dd,  $J$  = 1, 8 Hz) ppm. – <sup>13</sup>C NMR (75 MHz): 11.77, 20.20, 20.28, 25.13, 26.67, 27.26, 36.44, 43.62, 57.74, 60.27, 71.65, 116.05, 123.31, 125.02, 127.54, 127.86, 128.02, 128.33, 128.64, 128.90, 129.46, 129.77, 130.63, 137.40, 139.54, 145.18, 148.76, 156.88 ppm.

**5,7-Dichloro-2-methylquinolin-8-ol<sup>27</sup> (**8a**)**

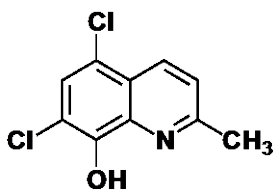

According to GP1, **9** (71 mg, 0.31 mmol) was reacted with copper(I) chloride (3 mg, 0.031 mmol, 10 mol %), magnesium chloride (92 mg, 0.92 mmol, 3 equiv), and methylmagnesium chloride (381  $\mu$ L, 1.22 mmol, 4 equiv, 3.2M in diethyl ether) in diethyl ether (1.5 mL). The crude product was purified by column chromatography to yield **8a** (44 mg, 63 %) as brown oil. – <sup>1</sup>H NMR (500 MHz): 2.72 (3 H, s), 7.34 (1 H, d,  $J$  = 8.5 Hz), 7.42 (1 H, s), 8.24 (1 H, d,  $J$  = 8.5 Hz) ppm. – <sup>13</sup>C NMR (125 MHz): 24.8, 144.9, 120.6, 122.9, 123.4, 127.0, 133.3, 137.9, 146.9, 158.8 ppm. – IR: 1323, 1449, 1498, 1598, 3419  $\text{cm}^{-1}$ .

### 5,7-Dichloro-2-cyclohexylquinolin-8-ol (**8b**)

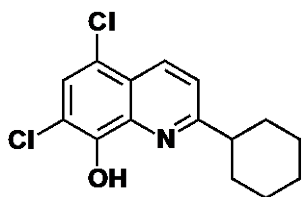

According to GP1, **9** (60 mg, 0.31 mmol) was reacted with copper(I) chloride (3 mg, 0.031 mmol, 10 mol %), magnesium chloride (92 mg, 0.92 mmol, 3 equiv), and cyclohexylmagnesium chloride (938  $\mu\text{L}$ , 1.22 mmol, 4 equiv, 1.3M in tetrahydrofuran/toluene) in diethyl ether (1.5 mL). The crude product was purified by column chromatography to yield **8b** (75 mg, 84 %) as brown oil. –  $^1\text{H}$  NMR (500 MHz): 0.85–2.02 (10 H, m), 2.88–2.96 (1 H, m), 3.15–3.93 (1 H, br s), 7.46 (1 H, d,  $J = 8.5$  Hz), 7.52 (1 H, s), 8.39 (1 H, d,  $J = 8.5$  Hz) ppm. –  $^{13}\text{C}$  NMR (75 MHz): 25.98, 26.38, 32.57, 46.53, 114.79, 120.57, 121.80, 123.49, 127.10, 133.70, 137.95, 147.24, 166.44 ppm. – IR: 1084, 1146, 1252, 1381, 1497, 2853, 2964, 3025  $\text{cm}^{-1}$ . – MS (ESI): 316.0  $[\text{M}]^+$ , calcd: 320.0240, found: 322.9257  $[\text{M} + \text{H}]^+$ .

### 5-Chloro-2-methylquinolin-8-ol<sup>28</sup> (**8c**)

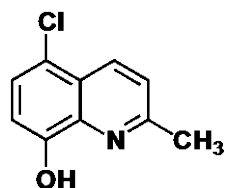

According to GP1, **9b** (60 mg, 0.31 mmol) was reacted with copper(I) chloride (3 mg, 0.031 mmol, 10 mol %), magnesium chloride (92 mg, 0.92 mmol, 3 equiv), and methylmagnesium bromide (387  $\mu\text{L}$ , 1.22 mmol, 4 equiv, 3.2M in diethyl ether) in diethyl ether (1.5 mL). The crude product was purified by column chromatography to yield **8c** (57 mg, 96 %) as brown oil. –  $^1\text{H}$  NMR (500 MHz): 2.76 (3 H, s), 7.07 (1 H, d,  $J = 8.5$  Hz), 7.41–7.45 (2 H, m), 8.39 (1 H, d,  $J = 9$  Hz) ppm. –  $^{13}\text{C}$  NMR (125 MHz): 24.84, 109.78, 120.27, 123.52, 124.47, 126.36, 133.41, 138.05, 150.75, 157.66 ppm. – IR: 1042, 1204, 1368, 1471, 1624, 3065, 3124, 3206  $\text{cm}^{-1}$ .

### 5-Chloro-2-(3-methoxyphenyl)quinolin-8-ol (**8d**)

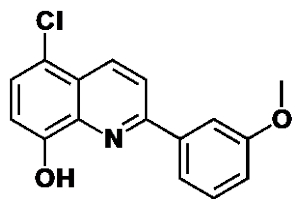

According to GP1, **9b** (60 mg, 0.31 mmol) was reacted with copper(I) chloride (3 mg, 0.031 mmol, 10 mol %), magnesium chloride (92 mg, 0.92 mmol, 3 equiv), and 3-methoxyphenylmagnesium bromide (1.22  $\mu$ L, 1.22 mmol, 4 equiv, 1M in tetrahydrofuran) in diethyl ether (1.5 mL). The crude product was purified by column chromatography to yield **8d** (42 mg, 54 %) as yellow oil. –  $^1\text{H}$  NMR (300 MHz): 3.93 (3 H, s), 7.05 (1 H, ddd,  $J = 1, 3, 9$  Hz), 7.12 (1 H, d,  $J = 9$  Hz), 7.44–7.50 (2 H, m), 7.69–7.72 (2 H, m), 8.00 (1 H, d,  $J = 10$  Hz), 8.24–8.39 (1 H, br s), 8.56 (1 H, d,  $J = 10$  Hz) ppm. –  $^{13}\text{C}$  NMR (75 MHz): 55.48, 110.21, 113.13, 115.31, 119.92, 120.39, 120.44, 125.25, 127.14, 130.01, 134.33, 139.59, 151.31, 155.31, 160.01 ppm. – IR: 1041, 1180, 1221, 1325, 1429, 1507, 2834, 2931, 3071, 3384  $\text{cm}^{-1}$ .

### 5,7-Dichloro-8-hydroxyquinoline 1-oxide<sup>4a,14a,29</sup> (**9a**)

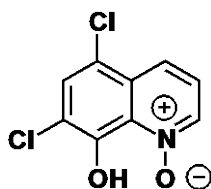

**9a** was prepared according to literature.<sup>29</sup> –  $^1\text{H}$  NMR (300 MHz): 7.40 (1 H, dd,  $J = 6, 9$  Hz), 7.70 (1 H, s), 8.17 (1 H, d,  $J = 9$  Hz), 8.33 (1 H, d,  $J = 6$  Hz) ppm. –  $^{13}\text{C}$  NMR (75 MHz): 118.89, 118.98, 121.37, 126.96, 128.42, 128.90, 131.39, 135.54, 149.68 ppm. – IR: 906, 1068, 1156, 1208, 1320, 1423, 1513, 2995, 3067, 3078  $\text{cm}^{-1}$ .

### 5-Chloro-8-hydroxyquinoline 1-oxide<sup>30</sup> (**9b**)

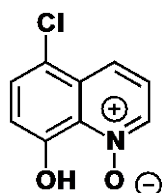

**9b** was prepared according to literature procedure.<sup>30</sup> –  $^1\text{H}$  NMR (300 MHz): 6.99 (1 H, d,  $J = 8.5$  Hz), 7.35–7.40 (1 H, m), 7.56 (1 H, d,  $J = 8.5$  Hz), 8.18 (1 H, dd,  $J = 1, 9$  Hz), 8.30 (1 H, dd,  $J = 1, 6$  Hz) ppm. –  $^{13}\text{C}$

NMR (75 MHz): 114.72, 119.07, 121.28, 126.70, 129.63, 130.70, 134.98, 148.36, 115.28 ppm. – IR: 1049, 1103, 1217, 1300, 1466, 1603, 1739, 2948, 3017, 3369  $\text{cm}^{-1}$ .

### 5,7-Dichloro-4-(4-fluorophenoxy)-2-phenylquinoline (10)

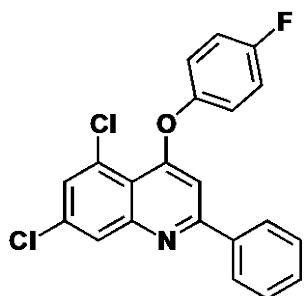

According to GP1, **S4** (25 mg, 0.077 mmol) was reacted with copper(I) chloride (1 mg, 0.008 mmol, 10 mol %), magnesium chloride (14 mg, 0.144 mmol, 2 equiv), and phenylmagnesium bromide (78  $\mu\text{L}$ , 0.233 mmol, 3 equiv, 3.2M in diethyl ether) in diethyl ether (400  $\mu\text{L}$ ). The crude product was purified by column chromatography to yield **10** (20 mg, 68 %) as yellow oil. –  $^1\text{H}$  NMR (500 MHz): 7.09 (1 H, s), 7.19–7.20 (4 H, m), 7.39–7.48 (3 H, m), 7.57 (1 H, d,  $J = 2$  Hz), 7.94–7.96 (2 H, m), 8.10 (1 H, d,  $J = 2$  Hz) ppm. –  $^{13}\text{C}$  NMR (125 MHz): 104.66, 117.15 (d,  $J = 23$  Hz), 122.15 (d,  $J = 8.5$  Hz), 127.37, 128.07, 128.88, 129.17, 130.03, 130.14, 135.19, 138.26, 150.11, 151.74, 159.00, 159.57, 160.94, 162.94 ppm. – IR: 1109, 1259, 1340, 1482, 1527, 2978, 3021, 3046  $\text{cm}^{-1}$ . – MS (ESI): 383.9, calcd: 384.0353, found: 384.0114 [ $\text{M} + \text{H}^+$ ].

### 5-((7-Chloro-2-isobutylquinolin-4-yl)amino)-2-((diethylamino)methyl)phenol (11a)

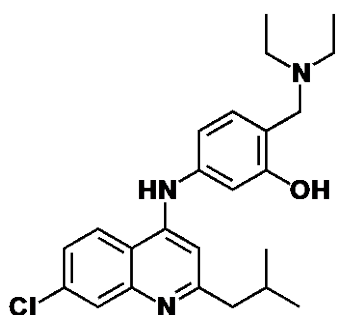

To a solution of **13a** (10 mg, 0.037 mmol) in ethanol (1 mL) was added **S3** (10 mg, 0.037 mmol, 1 equiv) and heated to 100  $^{\circ}\text{C}$ . After 48 h, the reaction was concentrated under reduced pressure and purified by column chromatography [dichloromethane/methanol] to yield **11a** (14 mg, 93 %) as yellow oil. –  $^1\text{H}$  NMR (500 MHz): 0.97–1.05 (7 H, m), 1.22–1.38 (7 H, m), 2.15–2.58 (5 H, m), 3.71 (1 H, sept,  $J = 6.5$  Hz), 5.29 (1 H, d,  $J = 7$  Hz), 6.52 (1 H, s), 7.36 (1 H, dd,  $J = 2, 9$  Hz), 7.45 (1 H, d,  $J = 7$  Hz), 7.70 (1 H, d,  $J = 9$  Hz), 8.01 (1 H, d,  $J = 2$  Hz) ppm. –  $^{13}\text{C}$  NMR (125 MHz): 11.20, 22.52, 29.26, 29.70, 46.28,

56.58, 100.35, 116.06, 120.95, 124.80, 125.77, 128.97, 129.20, 130.62, 134.88, 135.75, 131.77, 148.91, 149.17, 162.09 ppm. – IR: 1098, 1174, 1327, 1387, 1435, 1521, 2956, 2999, 3031  $\text{cm}^{-1}$ . – MS (ESI): 411.0, calcd: 412.2150, found: 412.2757  $[\text{M} + \text{H}^+]$ .

**5-((7-Chloro-2-(4-chlorophenyl)quinolin-4-yl)amino)-2-((diethylamino)methyl)phenol (11b)**

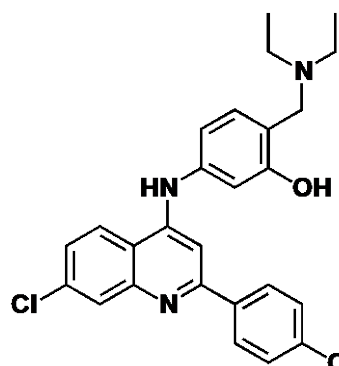

To a solution of **13b** (50 mg, 0.163 mmol) in ethanol (2 mL) was added **S3** (43 mg, 0.163 mmol, 1 equiv) and heated to 100 °C. After 48 h, the reaction was concentrated under reduced pressure and purified by column chromatography [dichloromethane/methanol] to yield **11b** (63 mg, 84 %) as yellow oil. –  $^1\text{H}$  NMR (500 MHz): 1.16 (6 H, d,  $J = 7.5$  Hz), 2.68 (4 H, quart,  $J = 7.5$  Hz), 3.82 (2 H, s), 6.70–6.78 (3 H, m), 7.00 (1 H, d,  $J = 8$  Hz), 7.17–7.59 (4 H, m), 7.80 (1 H, d,  $J = 9$  Hz), 7.90 (2 H, d,  $J = 8$  Hz), 8.08 (1 H, s) ppm. –  $^{13}\text{C}$  NMR (125 MHz): 11.17, 46.32, 56.56, 100.42, 109.99, 112.57, 117.30, 118.71, 121.12, 125.84, 128.64, 128.76, 128.83, 128.95, 129.33, 135.37, 135.61, 138.33, 139.91, 148.12, 149.12, 157.99, 159.76 ppm – MS (ESI): 467.0, calcd: 467.4096, found: 467.3091  $[\text{M} + \text{H}^+]$ .

**4,7-Dichloroquinoline 1-oxide<sup>4a, 12, 14a</sup> (12)**

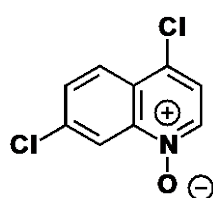

**12** was prepared according to literature procedure.<sup>14a</sup> – m.p.: 164–165 °C<sup>13</sup> –  $^1\text{H}$  NMR (500 MHz): 7.36 (1 H, d,  $J = 6.5$  Hz), 7.68 (1 H, d,  $J = 9$  Hz), 8.13 (1 H, d,  $J = 9$  Hz), 8.43 (1 H, d,  $J = 6.5$  Hz), 8.77 (1 H, s) ppm. –  $^{13}\text{C}$  NMR (125 MHz): 119.93, 121.22, 125.60, 126.52, 128.68, 130.80, 135.96, 142.33, 150.88 ppm. – IR: 829, 1091, 1291, 1367, 1412, 1555, 1609, 3025, 3094  $\text{cm}^{-1}$ .

### 4,7-Dichloro-2-(4-chlorophenyl)quinoline<sup>31</sup> (**13b**)

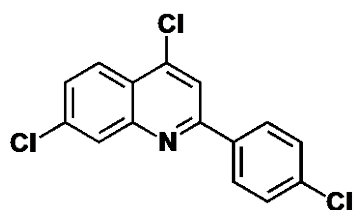

According to GP1, **5g** (38 mg, 0.177 mmol) was reacted with copper(I) chloride (2 mg, 0.017 mmol, 10 mol %), magnesium chloride (26 mg, 0.265 mmol, 1.5 equiv), and (4-chlorophenyl)magnesium chloride (344  $\mu$ L, 0.354 mmol, 2 equiv, 1M in diethyl ether) in diethyl ether (1 mL). The crude product was purified by column chromatography to yield **1b** (54 mg, 91 %) as colorless oil. – <sup>1</sup>H NMR (500 MHz): 7.50 (2 H, dd,  $J$  = 1.5, 8 Hz), 7.36 (1 H, d,  $J$  = 1.5 Hz), 7.56 (1 H, dt,  $J$  = 2, 9 Hz), 7.91 (1 H, d,  $J$  = 1.5 Hz), 8.09 (1 H, dd,  $J$  = 2, 8.5 Hz), 8.15 (2 H, dd,  $J$  = 1.5, 8.5 Hz) ppm. – <sup>13</sup>C NMR (125 MHz): 109.98, 118.74, 123.82, 125.34, 128.35, 128.73, 128.86, 129.18, 136.44, 136.83, 143.33, 139.32, 156.94 ppm. – IR: 1027, 1093, 1222, 1362, 1447, 1570, 2867, 2952, 3002  $\text{cm}^{-1}$ .

### *N*<sup>4</sup>-(7-Chloro-2-cyclohexylquinolin-4-yl)-*N*<sup>1</sup>,*N*<sup>1</sup>-diethylpentane-1,4-diamine (**15a**)

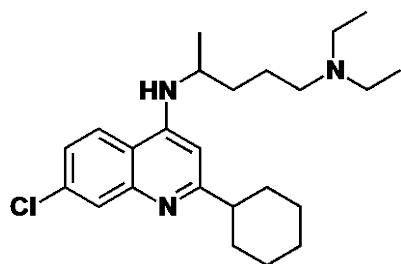

To solution of **16a** (50 mg, 0.179 mmol) in 2-amino-5-diethylaminopentane (1 mL) was added samarium triflate (11 mg, 0.018, 10 mol %) and heated to 140 °C. After 12 h the reaction was concentrated under reduced pressure and purified by column chromatography [dichloromethane /methanol] to yield **15a** (44 mg, 61 %) as yellow oil. – <sup>1</sup>H NMR (300 MHz): 1.00 (6 H, t,  $J$  = 7 Hz), 1.24–2.01 (16 H, m), 2.44–2.57 (7 H, m), 2.68–2.77 (1 H, m), 3.72 (1 H, t,  $J$  = 5 Hz), 5.12 (1 H, d,  $J$  = 5.5 Hz), 6.31 (1 H, s), 7.24–7.27 (1 H, m), 7.61 (1 H, d,  $J$  = 8.5 Hz), 7.91 (1 H, d,  $J$  = 2 Hz) ppm. – <sup>13</sup>C NMR (75 MHz): 11.28, 20.21, 23.72, 26.12, 26.59, 29.71, 32.90, 32.93, 34.55, 46.71, 48.01, 52.49, 97.02, 116.38, 120.8, 124.12, 128.32, 128.88, 134.55, 149.09, 168.72 ppm. – IR: 1147, 1227, 1289, 1379, 1449, 1532, 1609, 2850, 2926, 2957  $\text{cm}^{-1}$ . – MS (ESI): 401.0, calcd: 402.2671, found: 402.2671 [M + H<sup>+</sup>].



### *N*<sup>4</sup>-(7-Chloro-2-ethylquinolin-4-yl)-*N*<sup>1</sup>,*N*<sup>1</sup>-diethylpentane-1,4-diamine (**15b**)

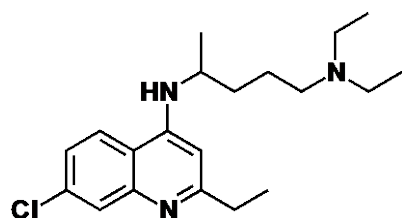

To a solution of **16b** (10 mg, 0.039 mmol) in 2-amino-5-diethylaminopentane (1 mL) was added samarium triflate (2 mg, 3.9  $\mu$ mol, 10 mol %) and heated to 140 °C. After 48 h, the reaction was concentrated under reduced pressure and purified by column chromatography [dichloromethane/methanol] to yield **15b** (12 mg, 82 %) as red oil.  $^1\text{H}$  NMR (500 MHz): 0.95 (6 H, d,  $J$  = 6.5 Hz), 1.15 (6 H, t,  $J$  = 7 Hz), 1.26 (2 H, s), 2.15 (1 H, sept.,  $J$  = 7 Hz), 2.37 (1 H, s), 2.63–2.71 (6 H, m), 3.81 (2 H, s), 5.31 (1 H, s), 6.69 (1 H, dd,  $J$  = 2.5, 8 Hz), 6.73 (1 H, d,  $J$  = 2 Hz), 6.96 (1 H, s), 6.99 (1 H, d,  $J$  = 8 Hz), 7.79 (2 H, d,  $J$  = 8.5 Hz), 8.01 (1 H, d,  $J$  = 2 Hz) ppm.  $^{13}\text{C}$  NMR (125 MHz): 11.35, 20.23, 20.25, 23.82, 34.63, 46.73, 46.79, 48.26, 52.53, 103.46, 109.57, 112.22, 116.98, 120.96, 125.28, 129.19, 140.12, 159.63 ppm. – IR: 1090, 1118, 1205, 1353, 1477, 1599, 2836, 2959, 3033, 3390  $\text{cm}^{-1}$ . – MS (ESI): 346.0, calcd: 347.2128, found: 347.2817 [M + H<sup>+</sup>].

### 4,7-Dichloro-2-cyclohexylquinoline (**16a**)

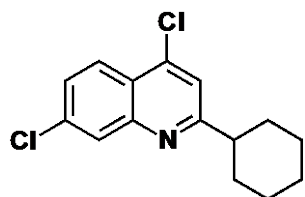

According to GP1, **4g** (38 mg, 0.177 mmol) was reacted with copper(I) chloride (2 mg, 0.017 mmol, 10 mol %), magnesium chloride (26 mg, 0.265 mmol, 1.5 equiv), and cyclohexylmagnesium chloride (264  $\mu$ L, 0.344 mmol, 2 equiv, 1.3M in tetrahydrofuran /toluene) in diethyl ether (1 mL). The crude product was purified by column chromatography to yield **16a** (26 mg, 53 %) as yellow oil.  $^1\text{H}$  NMR (500 MHz): 1.25–2.12 (10 H, m), 3.70–3.80 (1 H, m), 7.38 (1 H, s), 7.63 (1 H, dd,  $J$  = 1.5, 15 Hz), 8.10 (1 H, d,  $J$  = 15 Hz), 8.83 (1 H, d,  $J$  = 3 Hz) ppm.  $^{13}\text{C}$  NMR (125 MHz): 26.22, 30.34, 33.53, 37.97, 119.82, 120.12, 124.89, 126.46, 129.63, 137.92, 142.55, 151.45, 154.133 ppm. – IR: 1113, 1328, 1499, 1573, 2842, 3029  $\text{cm}^{-1}$ . – MS (ESI): 278.8, HRMS: calcd: 280.0654, found: 279.1800 [M + H<sup>+</sup>].

## References:

- [1] Bharathi, P.; Comins, D. L. *Org. Lett.* **2007**, *10*, 221–223.
- [2] Clemo, G. R.; Perkin, W. H. *J. Chem. Soc., Trans.* **1924**, *125*, 1608–1622.
- [3] O'Neill, P. M.; Mukhtar, A.; Stocks, P. A.; Randle, L. E.; Hindley, S.; Ward, S. A.; Storr, R. C.; Bickley, J. F.; O'Neil, I. A.; Maggs, J. L.; Hughes, R. H.; Winstanley, P. A.; Bray, P. G.; Park, B. K. *J. Med. Chem.* **2003**, *46*, 4933–4945.
- [4] (a) Cuny, G. D.; Hauske, J. R.; Hoemann, M. Z.; Chopra, I. Preparation of quinolinylindoles as antimicrobial agents. US6376670B1, 2002; (b) Arnold, W. R.; Coghlan, M. J.; Krumkalns, E. V.; Jourdan, G. P.; Suhr, R. G. Quinoline, quinazoline, and cinnoline fungicides and their preparation. EP326330A2, 1989.
- [5] Sharma, K. S.; Kumari, S.; Singh, R. P. *Synthesis* **1981**, 316–318.
- [6] Wengryniuk, S. E.; Weickgenannt, A.; Reiher, C.; Strotman, N. A.; Chen, K.; Eastgate, M. D.; Baran, P. S. *Org. Lett.* **2013**, *15*, 792–795.
- [7] Couturier, M.; Caron, L.; Tumidajski, S.; Jones, K.; White, T. D. *Org. Lett.* **2006**, *8*, 1929–1932.
- [8] Yang, K.; Qiu, Y.; Li, Z.; Wang, Z.; Jiang, S. *J. Org. Chem.* **2011**, *76*, 3151–3159.
- [9] Bjorsvik, H.-R.; Gambarotti, C.; Jensen, V. R.; Gonzalez, R. R. *J. Org. Chem.* **2005**, *70*, 3218–3224.
- [10] Kokatla, H. P.; Thomson, P. F.; Bae, S.; Doddi, V. R.; Lakshman, M. K., *J. Org. Chem.* **2011**, *76*, 7842–7848.
- [11] Gilman, H.; Edward, J. T. *Can. J. Chem.* **1953**, *31*, 457–468.
- [12] Rong, D.; Phillips, V. A.; Rubio, R. S.; Angeles Castro, M.; Wheelhouse, R. T. *Tetrahedron Lett.* **2008**, *49*, 6933–6935.
- [13] Elslager, E. F.; Tendick, F. H. Basic 7-chloroquinoline-1-oxide derivatives and methods for their production. GB19610002951, 1964.
- [14] (a) Arnold, W. R.; Coghlan, M. J.; Krumkalns, E. V.; Jourdan, G. P.; Suhr, R. G. Quinoline, quinazoline, and cinnoline fungicides. 1989; (b) Leclerc, J.-P.; Fagnou, K., *Angew. Chem. Int. Ed.* **2006**, *45*, 7781–7786.
- [15] Boykin, D. W.; Balakrishnan, P.; Baumstark, A. L. *J. Heterocycl. Chem.* **1985**, *22*, 981–984.
- [16] Landquist, J. K. *J. Chem. Soc.* **1953**, 2816–2821.

- [17] (a) Tobisu, M.; Hyodo, I.; Chatani, N. *J. Am. Chem. Soc.* **2009**, *131*, 12070–12071;  
(b) So, C. M.; Yeung, C. C.; Lau, C. P.; Kwong, F. Y. *J. Org. Chem.* **2008**, *73*, 7803–7806.
- [18] Deferrari, J. O. *J. Am. Chem. Soc.* **1950**, *38*, 283–299.
- [19] Roberts, C. C.; Barnett, B. R.; Green, D. B.; Fritsch, J. M. *Organometallics* **2012**, *31*, 4133–4141.
- [20] Xiao, F.; Chen, W.; Liao, Y.; Deng, G.-J. *Org. Biomol. Chem.* **2012**, *10*, 8593–8596.
- [21] Chen, M. Z.; Micalizio, G. C. *J. Am. Chem. Soc.* **2011**, *134*, 1352–1356.
- [22] Gemma, S.; Kukreja, G.; Tripaldi, P.; Altarelli, M.; Bernetti, M.; Franceschini, S.; Savini, L.; Campiani, G.; Fattorusso, C.; Butini, S. *Tetrahedron Lett.* **2008**, *49*, 2074–2077.
- [23] Seo, H. J.; Namgoong, S. K. *Tetrahedron Lett.* **2012**, *53*, 3594–3598.
- [24] Buu-Hoi, N. P.; Royer, R.; Xuong, N. D.; Jacquignon, P. *J. Org. Chem.* **1953**, *18*, 1209–1224.
- [25] Singh, P. P.; Aithagani, S. K.; Yadav, M.; Singh, V. P.; Vishwakarma, R. A. *J. Org. Chem.* **2013**, *78*, 2639–2648.
- [26] Zhang, W.; Hu, J.; Young, D. J.; Hor, T. S. A. *Organometallics* **2011**, *30*, 2137–2143.
- [27] Cieslik, W.; Musiol, R.; Nycz, J. E.; Jampilek, J.; Vejsova, M.; Wolff, M.; Machura, B.; Polanski, J. *Bioorg. Med. Chem.* **2012**, *20*, 6960–6968.
- [28] Talekar, R. S.; Chen, G. S.; Lai, S.-Y.; Chern, J.-W. *J. Org. Chem.* **2005**, *70*, 8590–8593.
- [29] Barnham, K. J.; Gautier, E. C. L.; Kok, G. B.; Krippner, G. US2008161353A1, 2008.
- [30] Hansen, P. E.; Spanget-Larsen, J. *J. Mol. Struct.* **2012**, *1018*, 8–13.
- [31] Bachman, G. B.; Bennett, G. E.; Barker, R. S. *J. Org. Chem.* **1950**, *15*, 1278–1284.

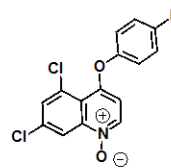

5,7-dichloro-4-(4-fluorophenoxy)quinoline 1-oxide

**S4**

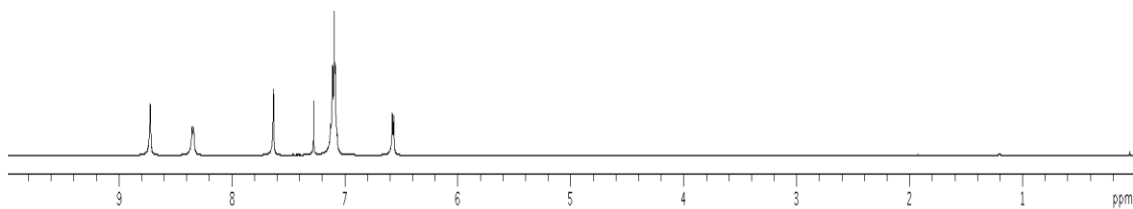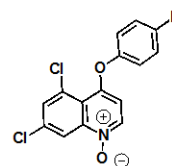

5,7-dichloro-4-(4-fluorophenoxy)quinoline 1-oxide

**S4**

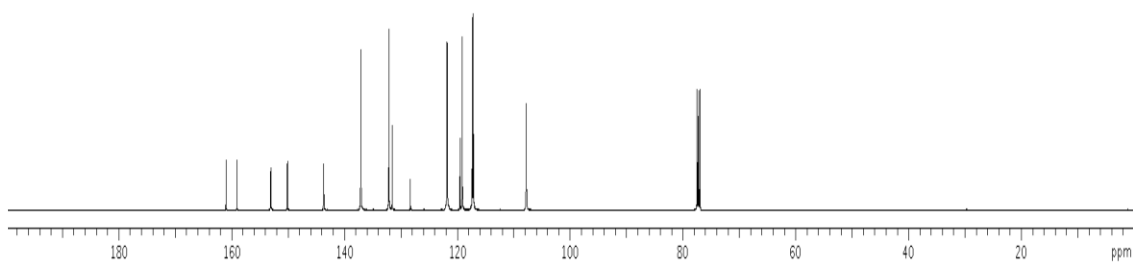

S28

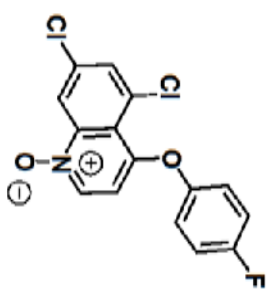

5,7-dichloro-4-(4-fluorophenoxy)quinoline 1-oxide

**S4**

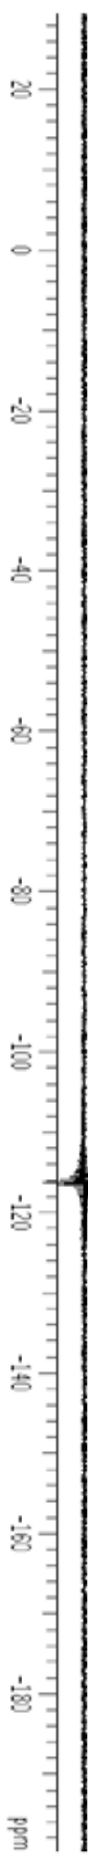

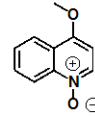

7-chloro-4-methoxyquinoline 1-oxide

**4b**

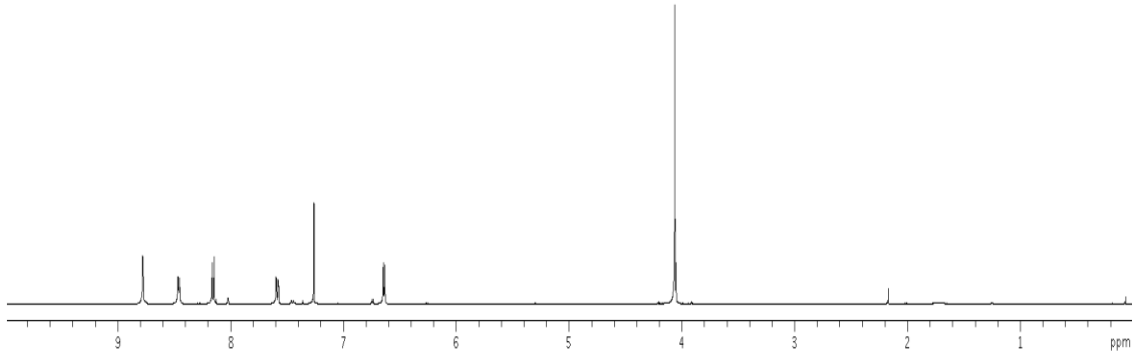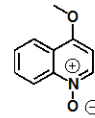

7-chloro-4-methoxyquinoline 1-oxide

**4b**

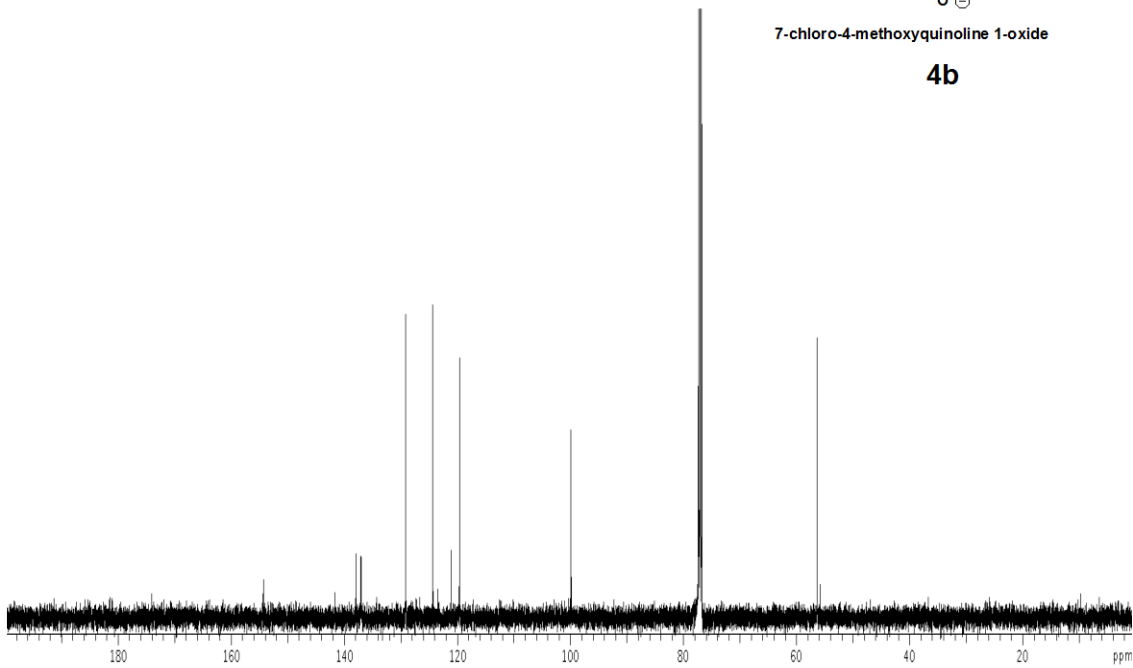

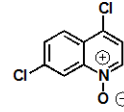

4,7-dichloroquinoline 1-oxide

**4g**

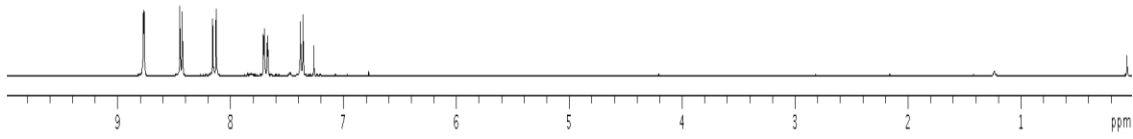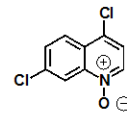

4,7-dichloroquinoline 1-oxide

**4g**

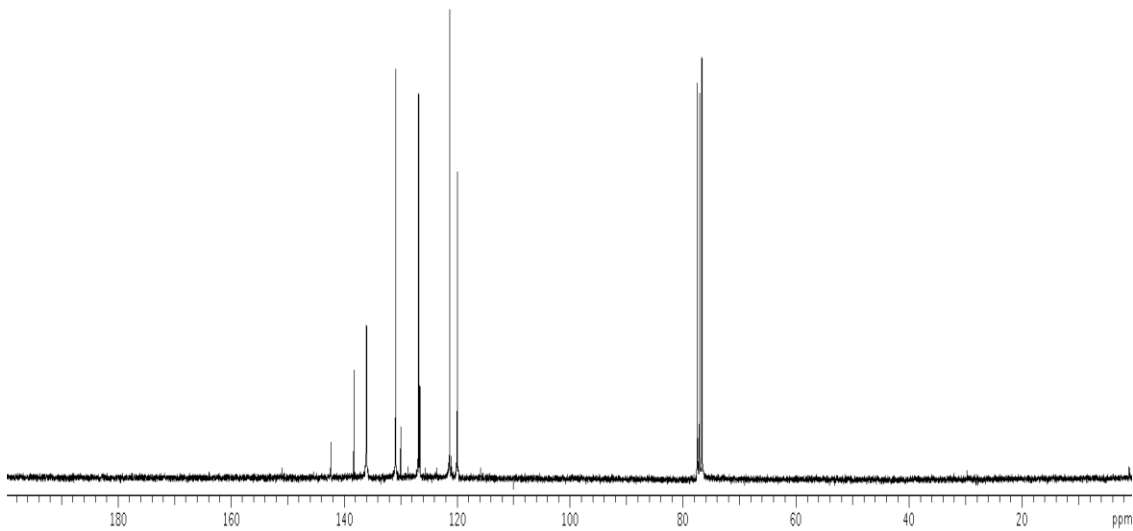

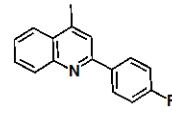

2-(4-fluorophenyl)-4-methylquinoline

**5ea**

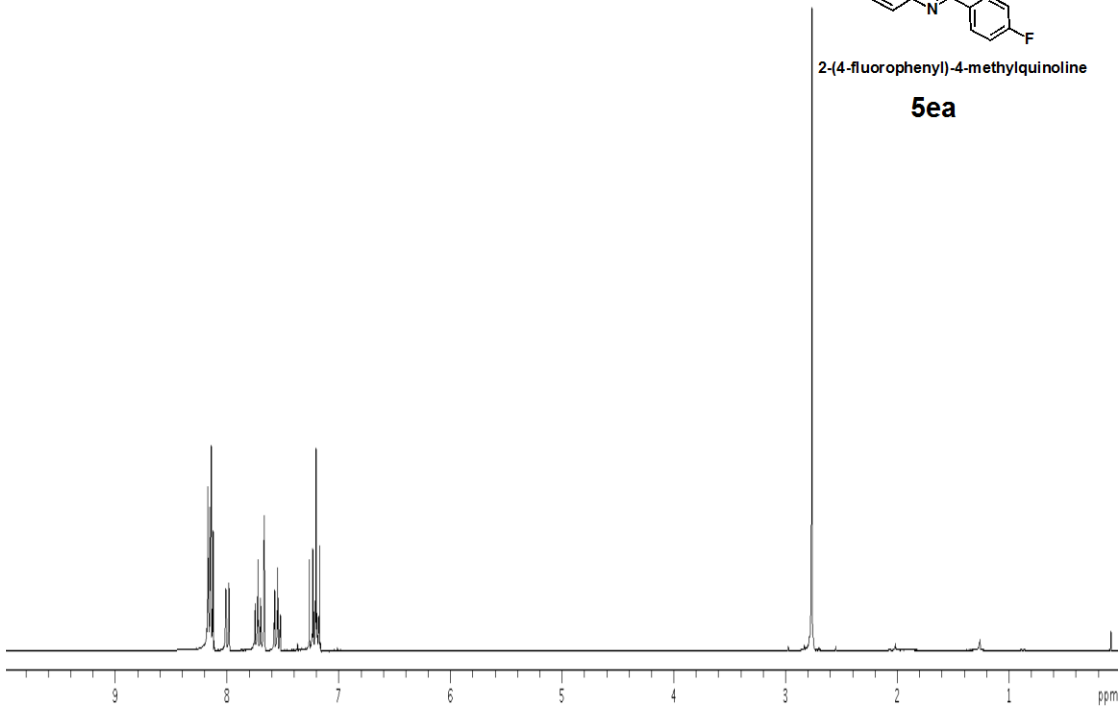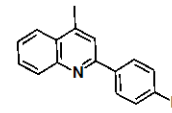

2-(4-fluorophenyl)-4-methylquinoline

**5ea**

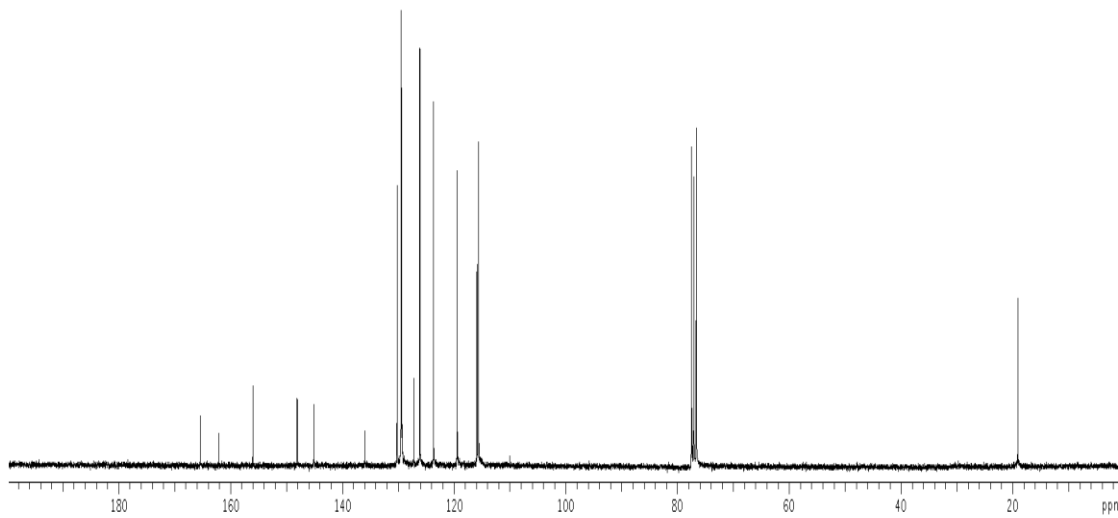





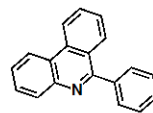

6-phenylphenanthridine

**5cd**

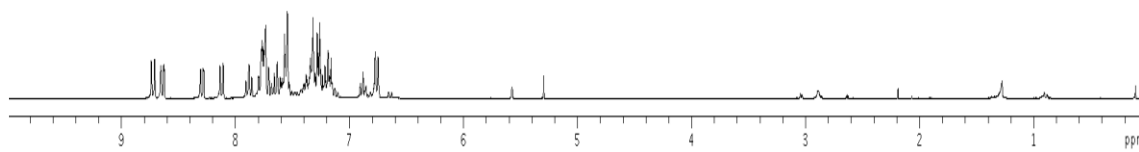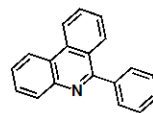

6-phenylphenanthridine

**5cd**

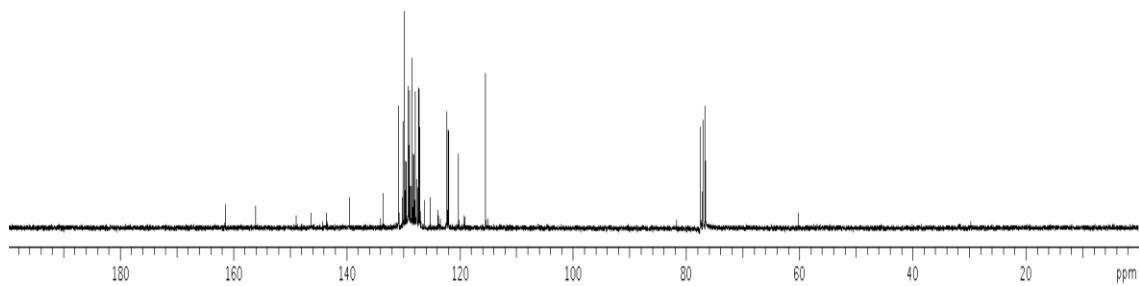

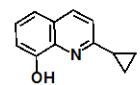

2-cyclopropylquinolin-8-ol

**5dc**

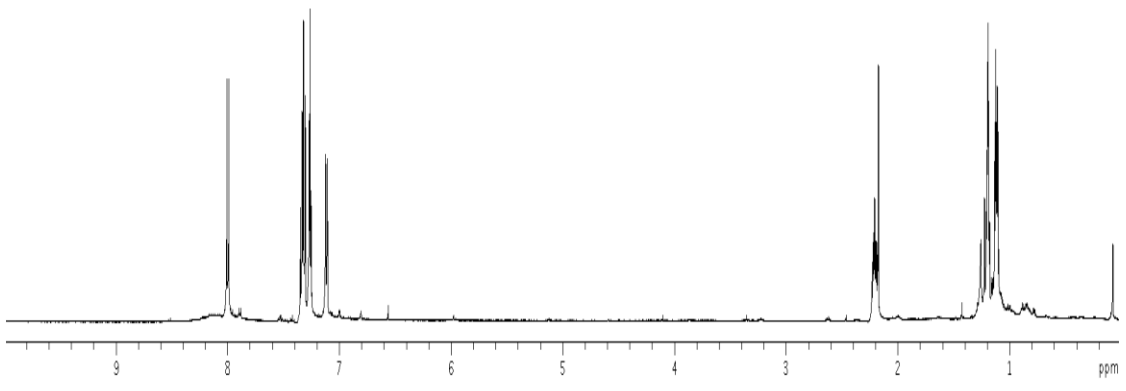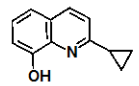

2-cyclopropylquinolin-8-ol

**5dc**

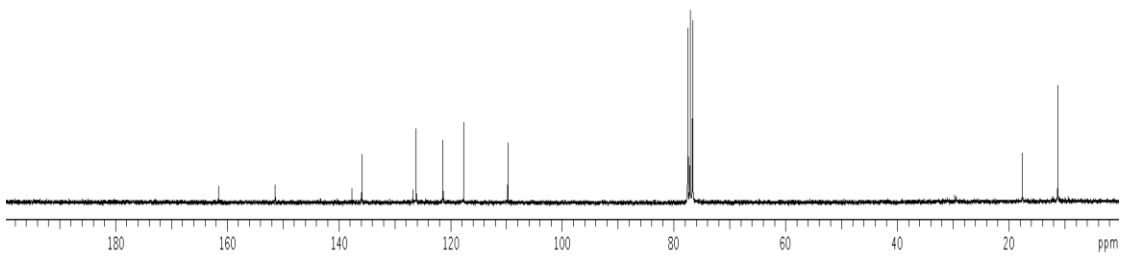

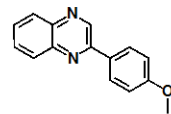

2-(4-methoxyphenyl)quinoxaline

**51o**

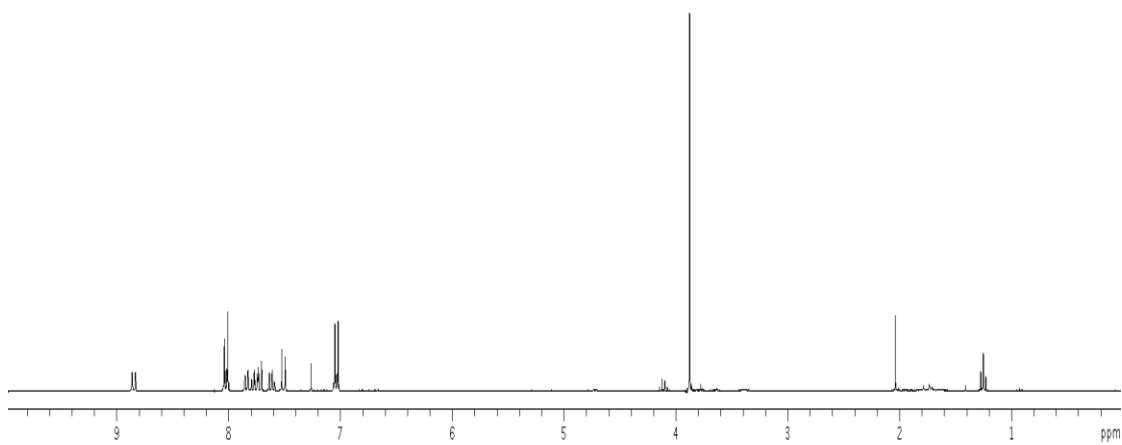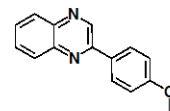

2-(4-methoxyphenyl)quinoxaline

**51o**

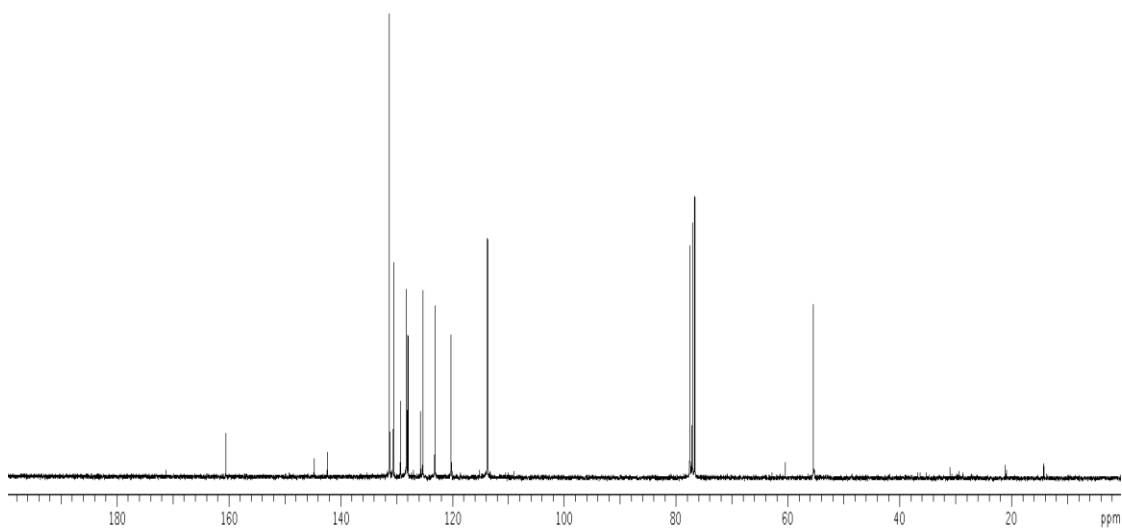

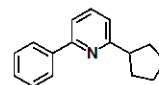

2-cyclopentyl-6-phenylpyridine

**5fe**

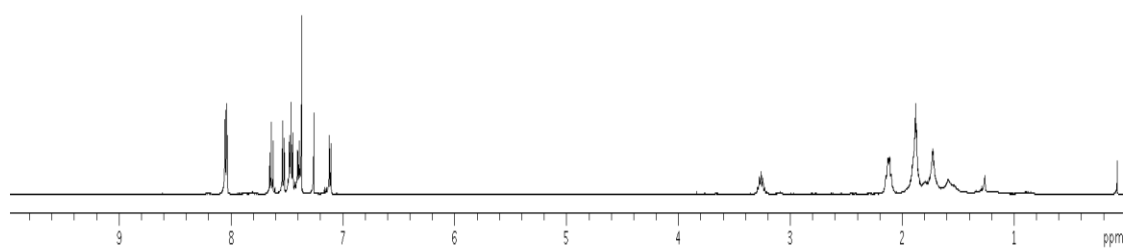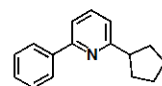

2-cyclopentyl-6-phenylpyridine

**5fe**

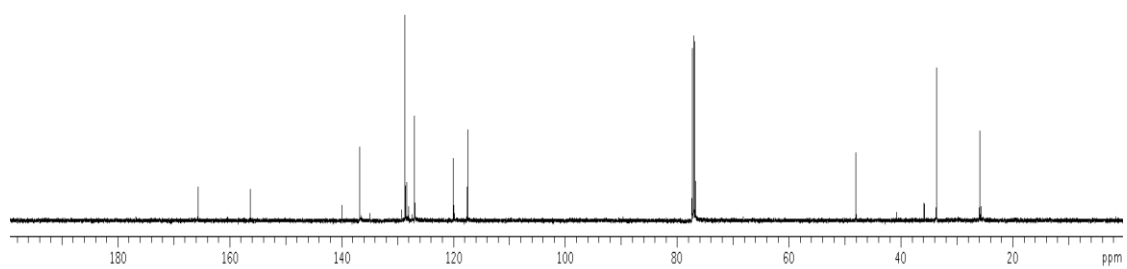

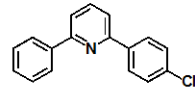

2-(4-chlorophenyl)-6-phenylpyridine

**5fg**

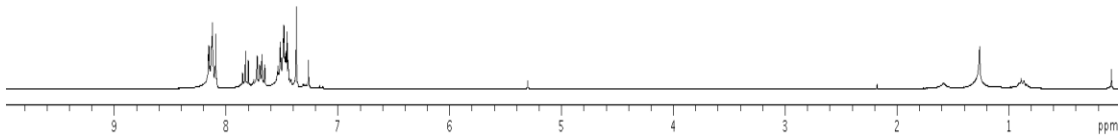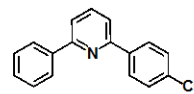

2-(4-chlorophenyl)-6-phenylpyridine

**5fg**

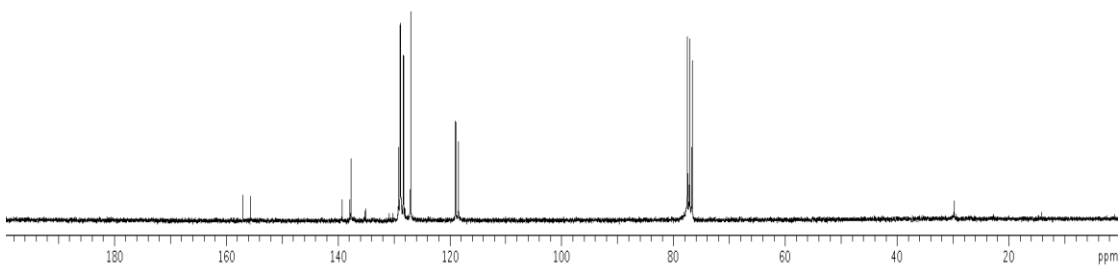

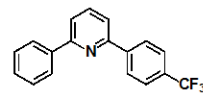

2-phenyl-6-(4-(trifluoromethyl)phenyl)pyridine

**5fn**

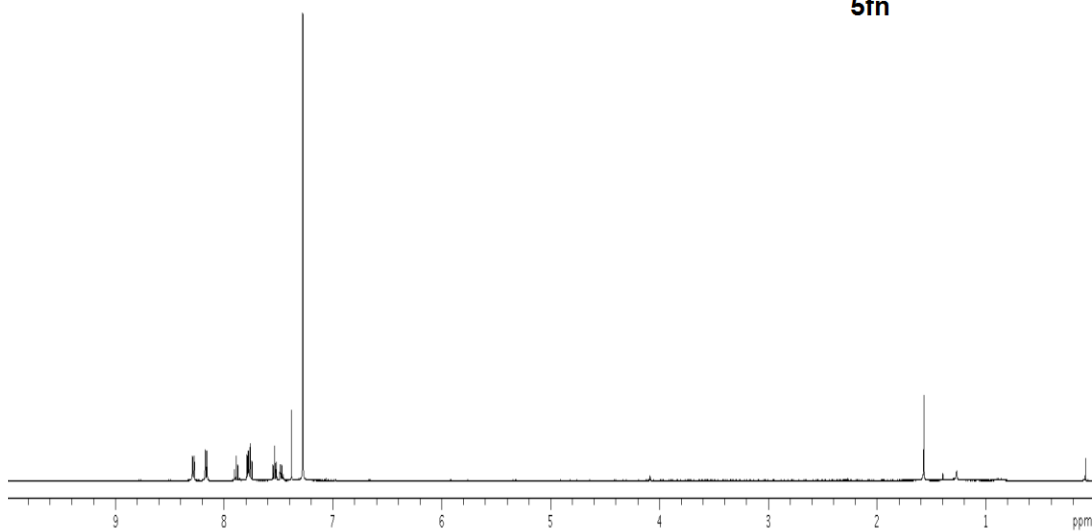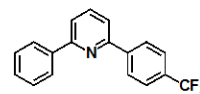

2-phenyl-6-(4-(trifluoromethyl)phenyl)pyridine

**5fn**

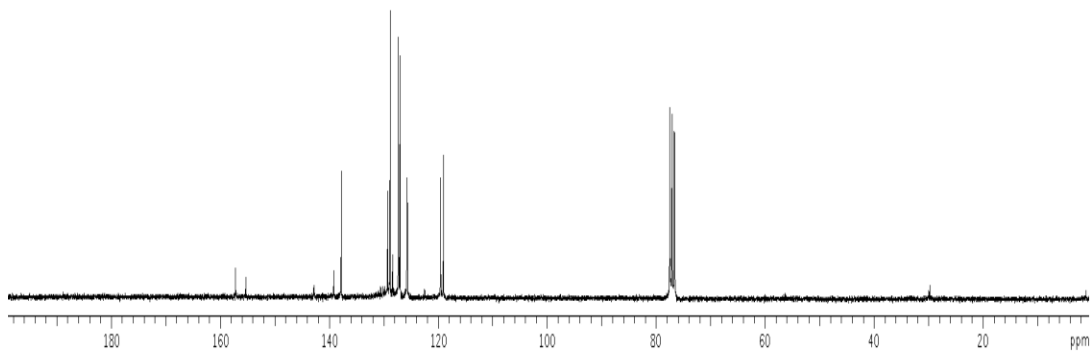

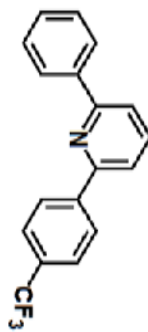

2-phenyl-6-(4-(trifluoromethyl)phenyl)pyridine

**5fn**

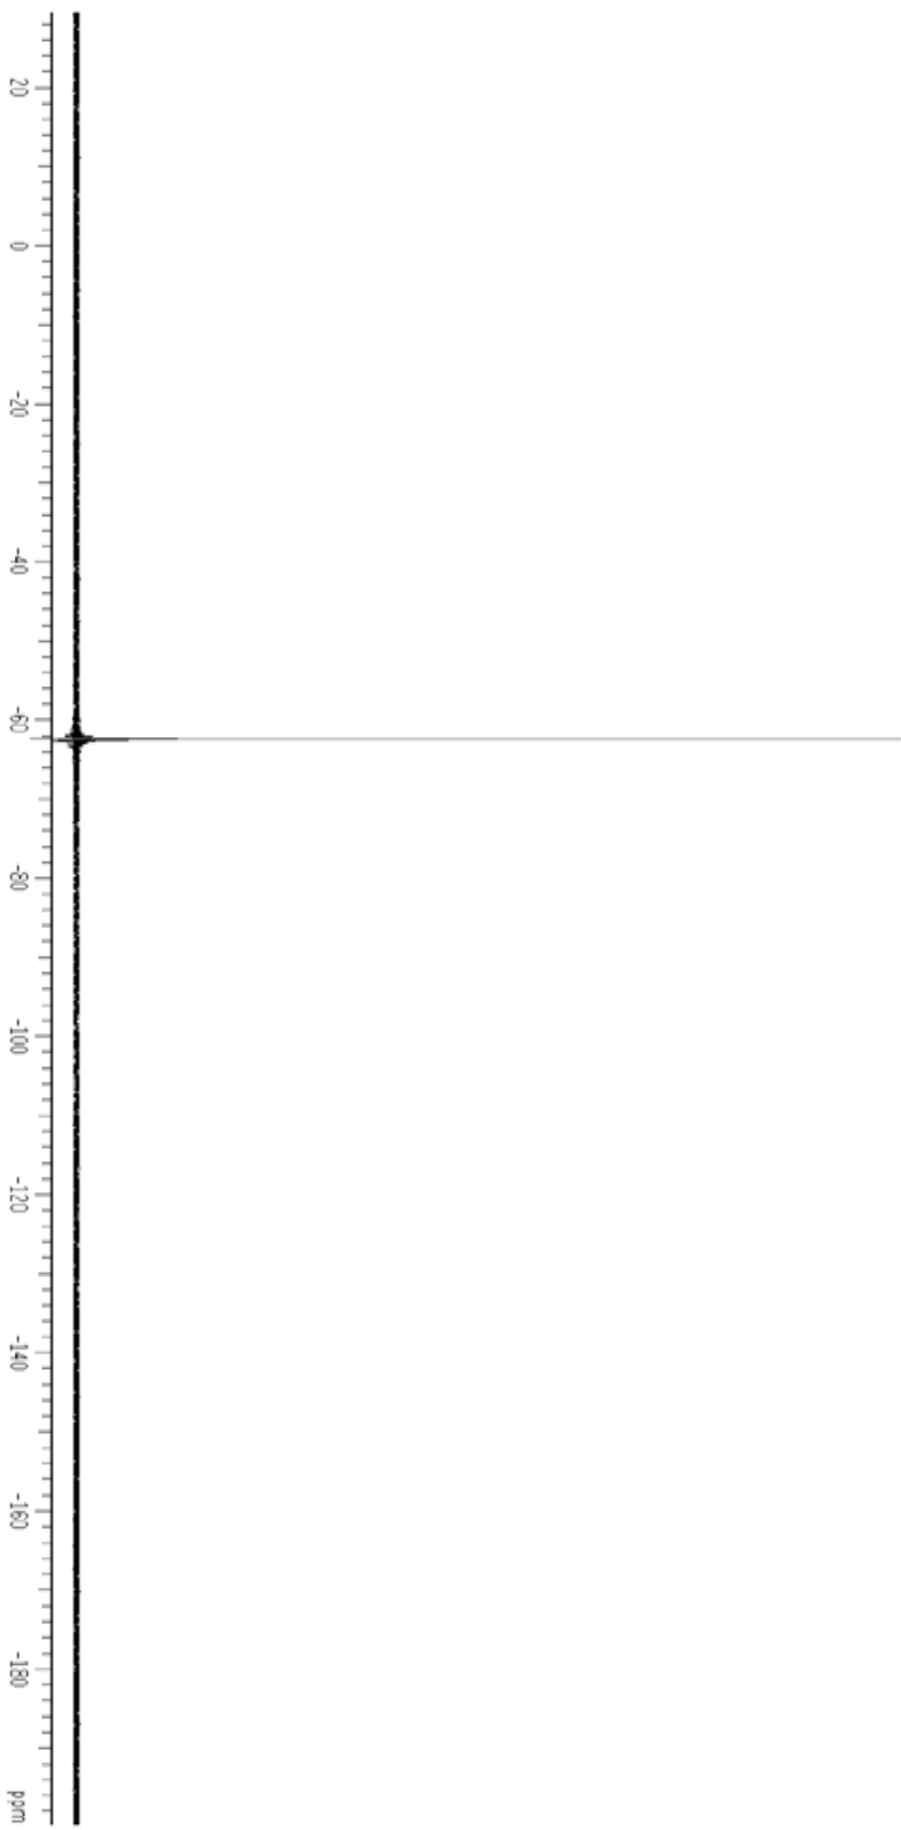



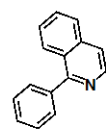

1-phenylisoquinoline

**5id**

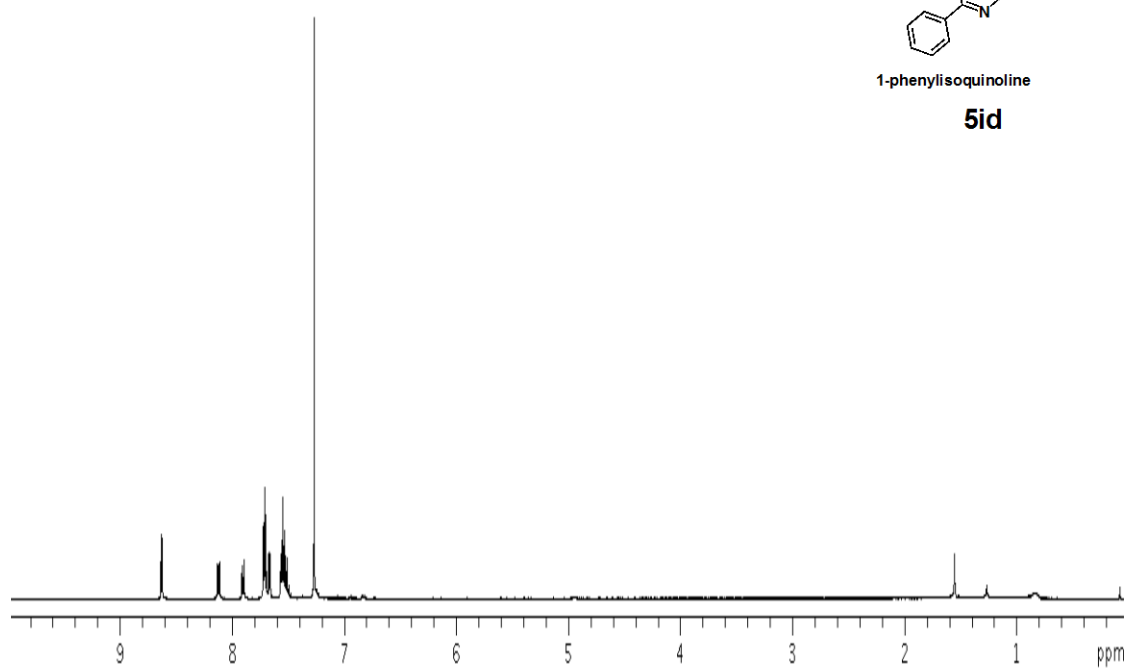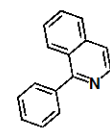

1-phenylisoquinoline

**5id**

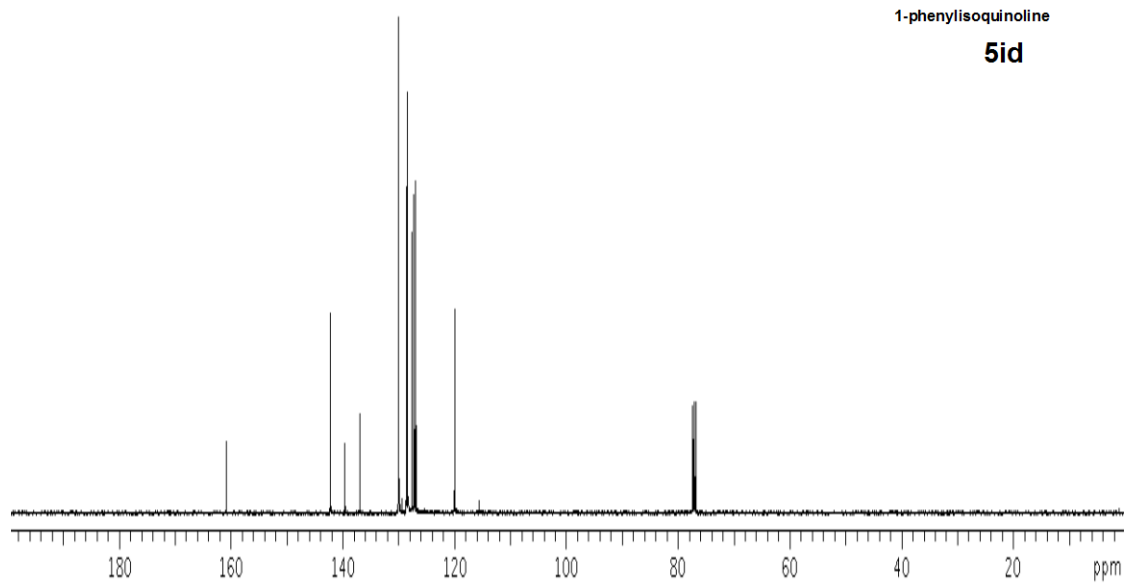

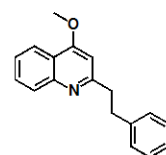

4-methoxy-2-phenethylquinoline

**5bj**

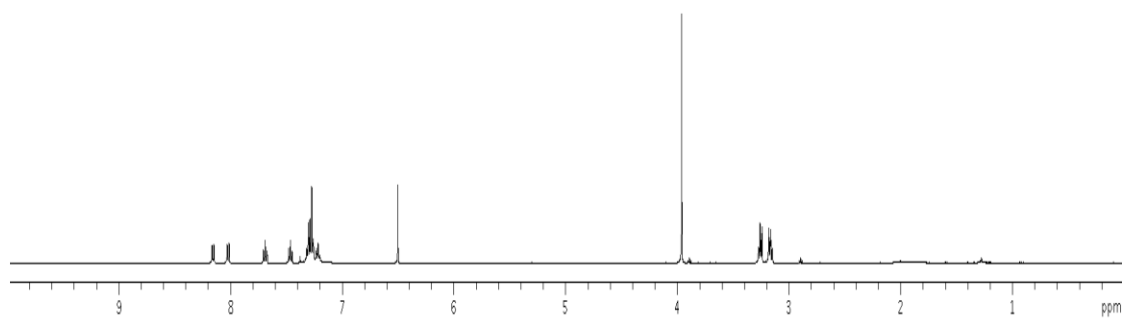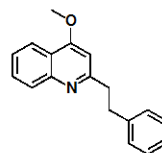

4-methoxy-2-phenethylquinoline

**5bj**

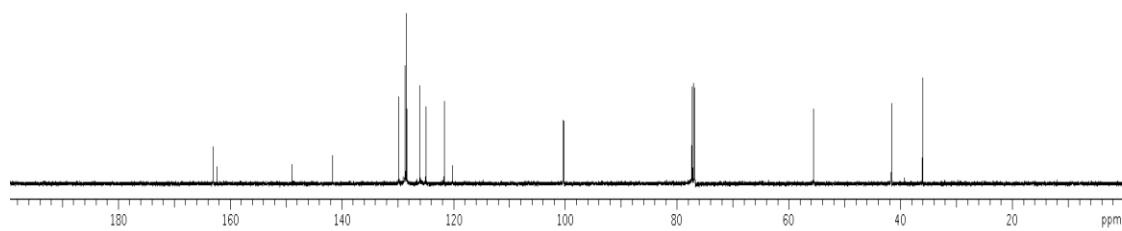

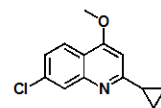

7-chloro-2-cyclopropyl-4-methoxyquinoline

**5hc#**

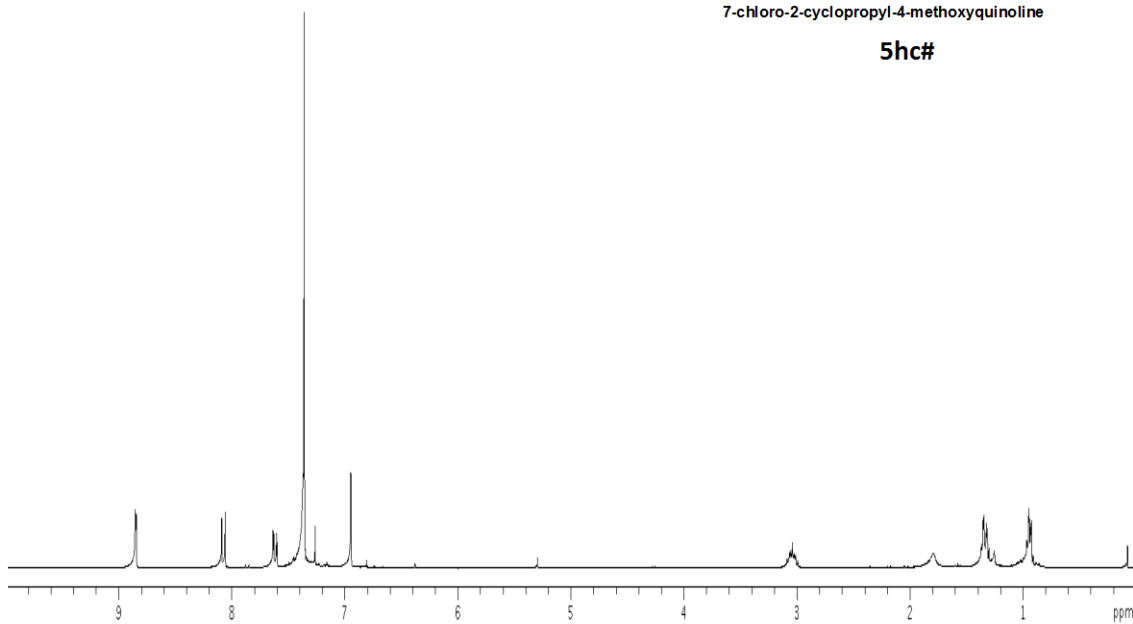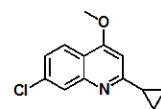

7-chloro-2-cyclopropyl-4-methoxyquinoline

**5hc**

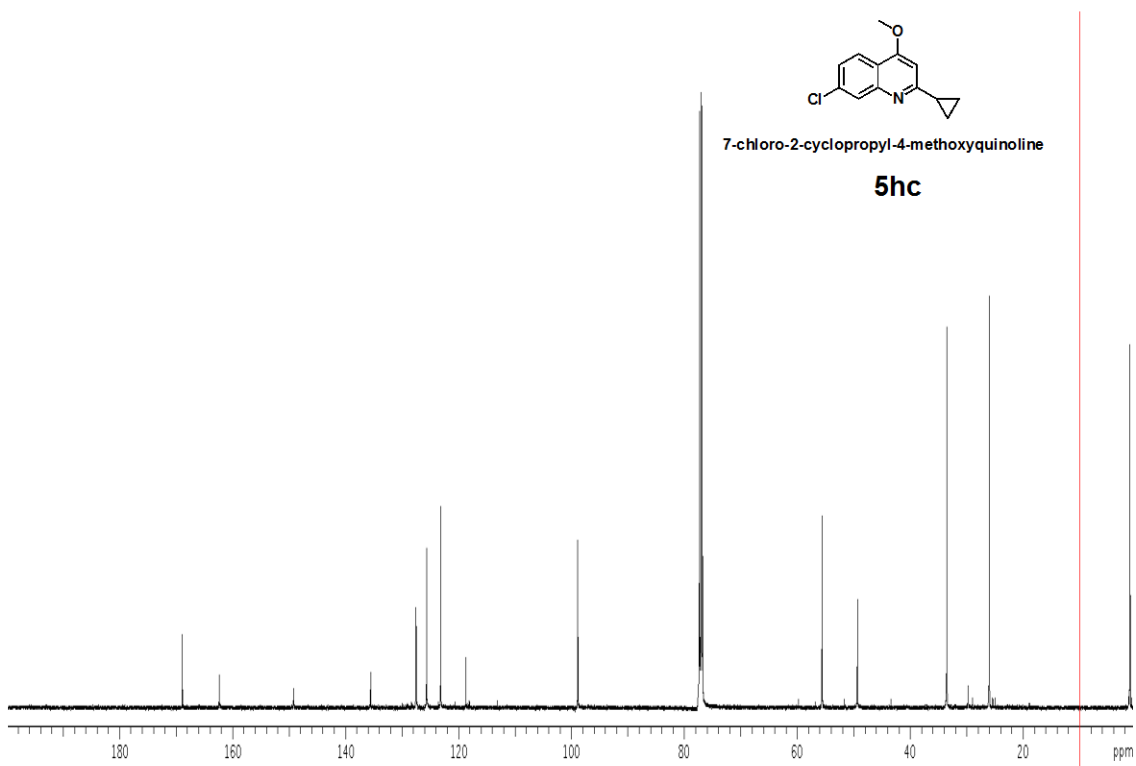

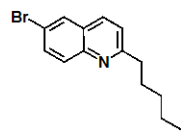

6-bromo-2-pentylquinoline

**5jI**

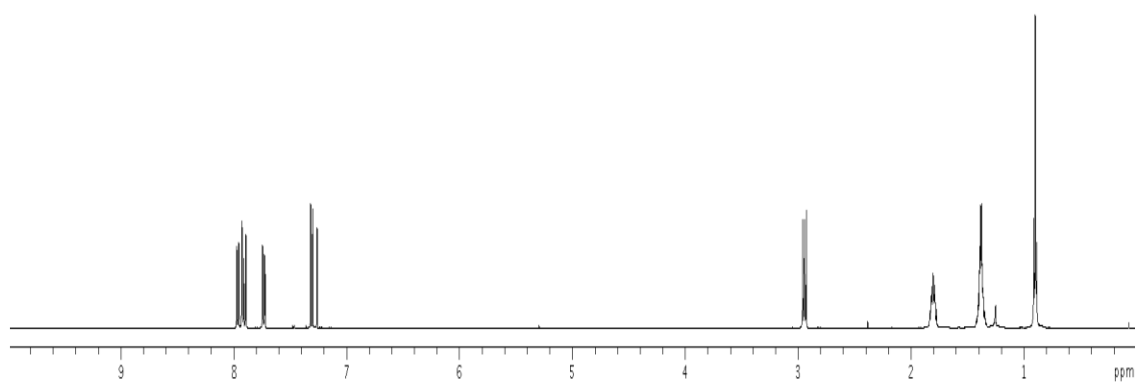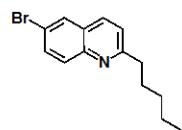

6-bromo-2-pentylquinoline

**5jI**

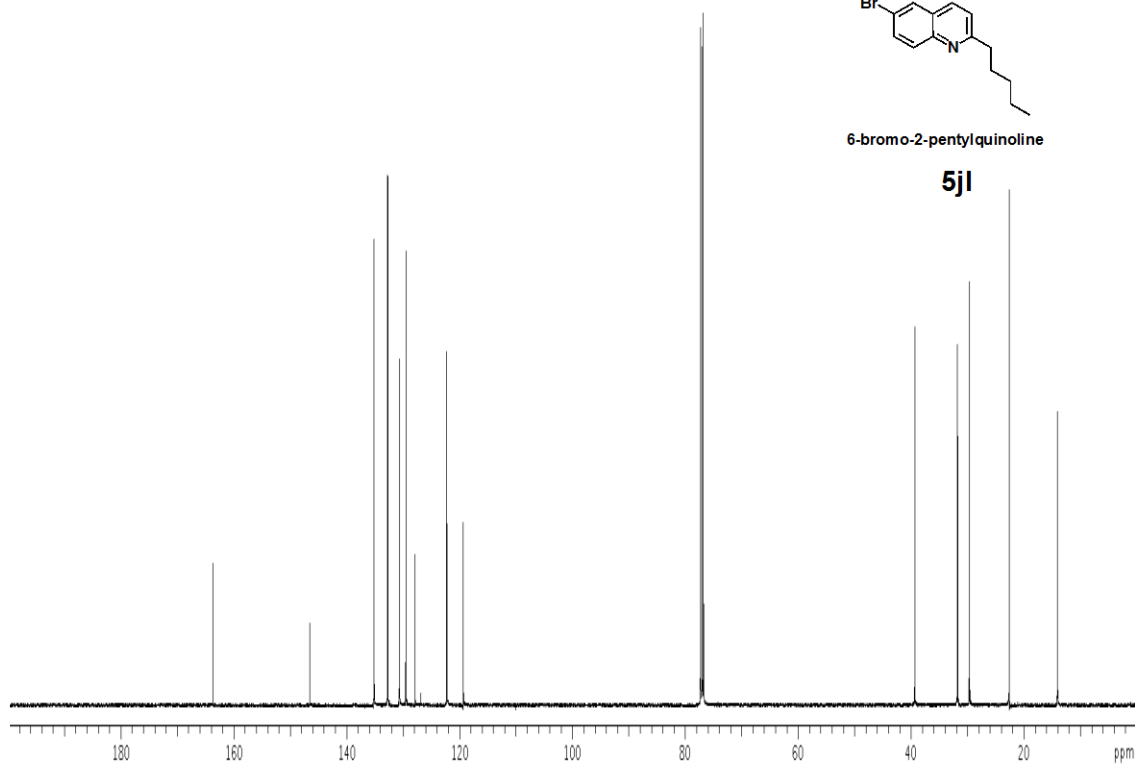

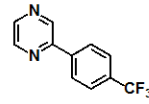

2-(4-(trifluoromethyl)phenyl)pyrazine

5kn

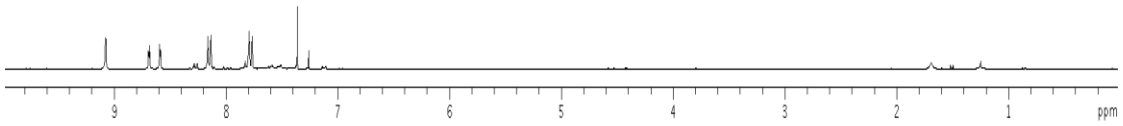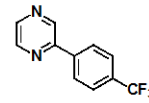

2-(4-(trifluoromethyl)phenyl)pyrazine

5kn

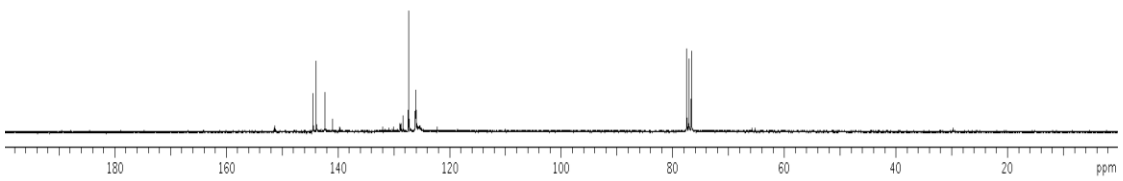

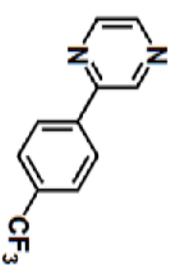

2-(4-(trifluoromethyl)phenyl)pyrazine

**5kn**

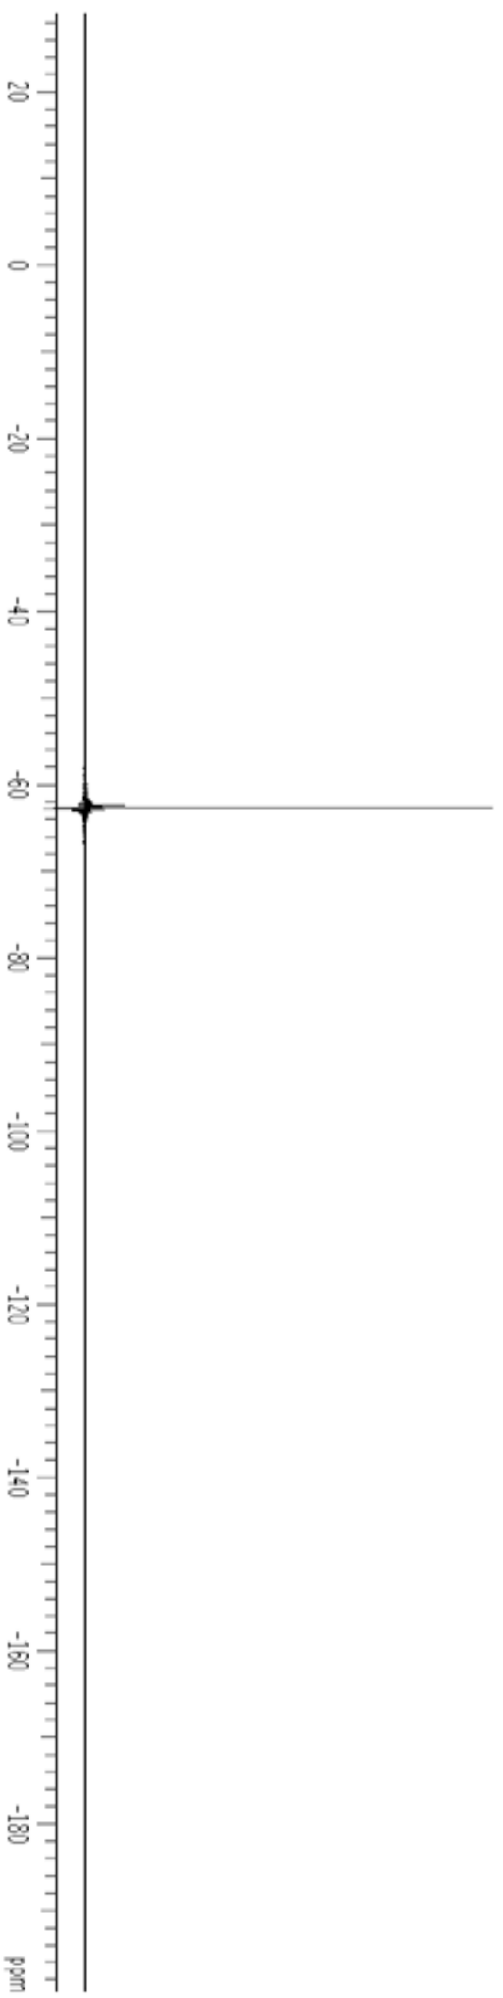

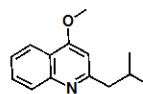

2-isobutyl-4-methoxyquinoline

**5bm**

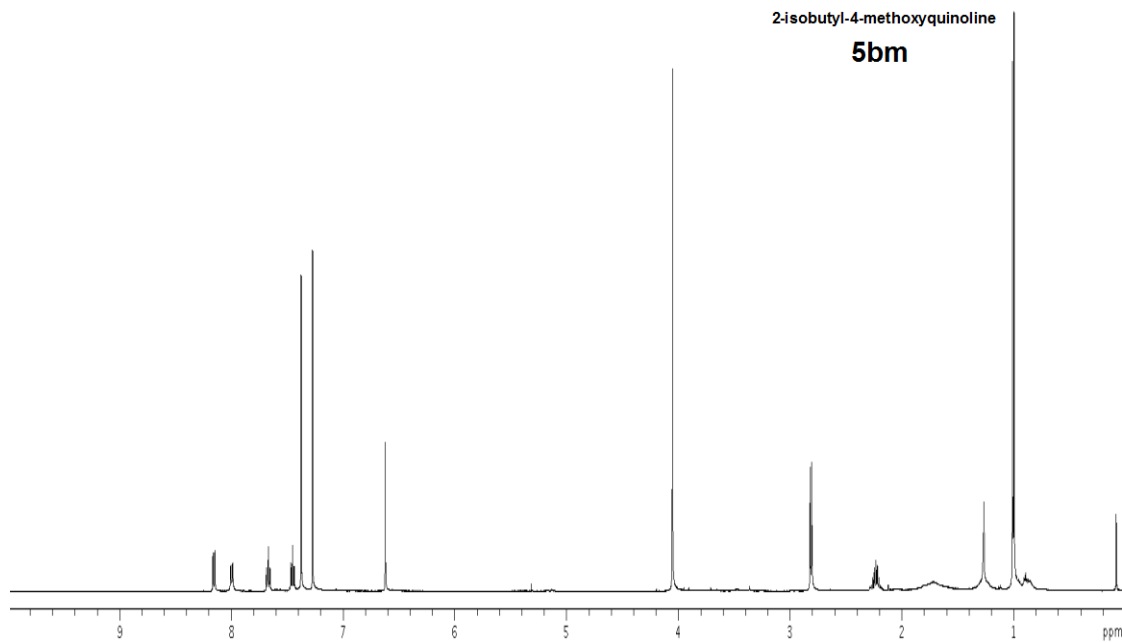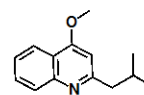

2-isobutyl-4-methoxyquinoline

**5bm**

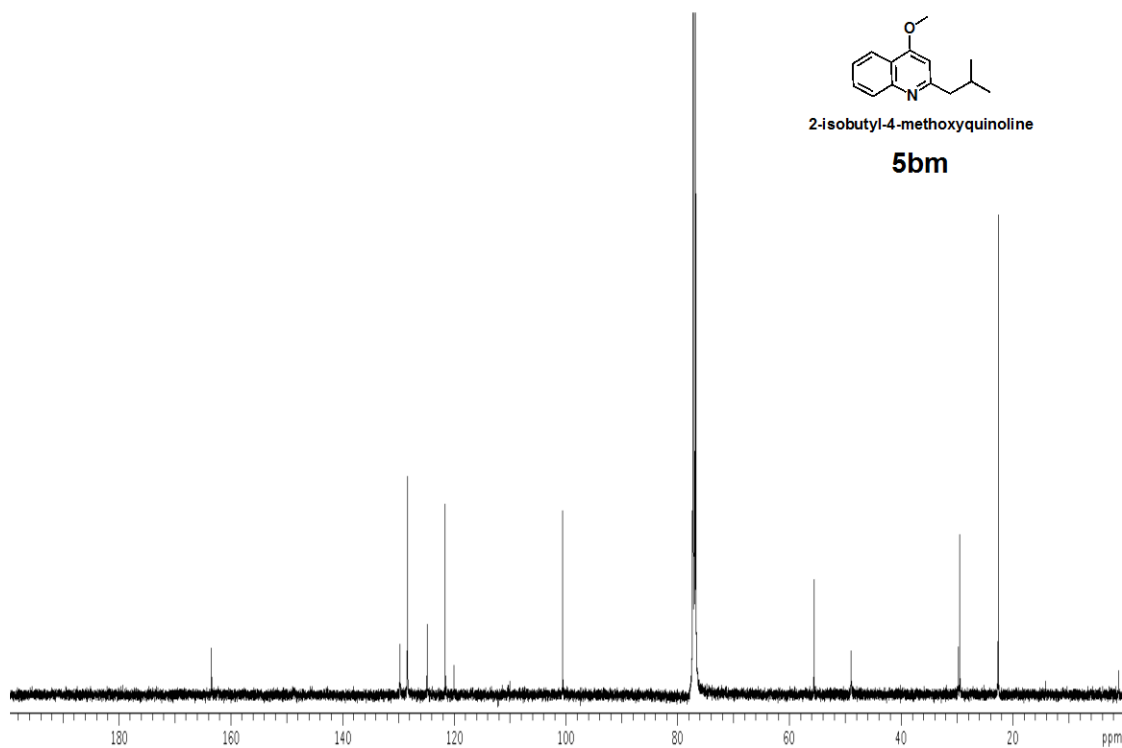

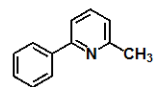

2-methyl-6-phenylpyridine

5" #

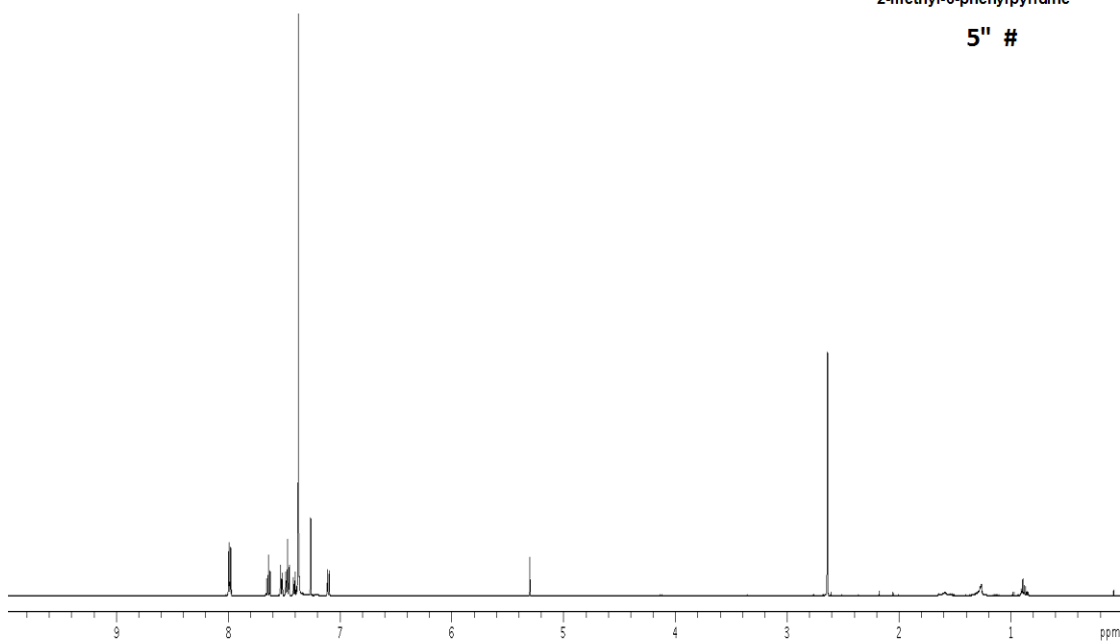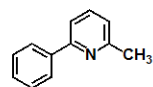

2-methyl-6-phenylpyridine

5fb

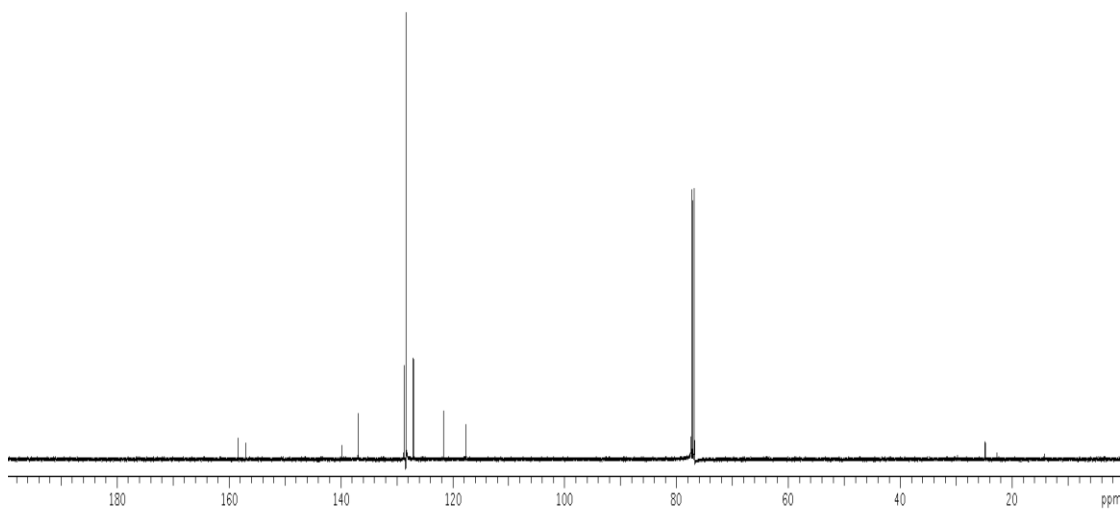



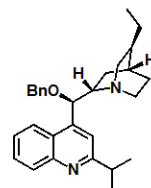

(1S,2S,4R,5S)-2-((R)-(benzyloxy)(2-isopropylquinolin-4-yl)methyl)-5-ethylquinuclidine

**6a**

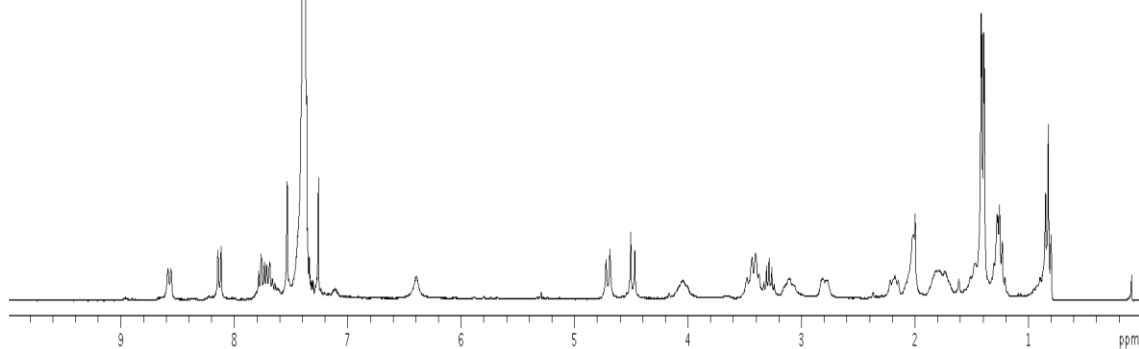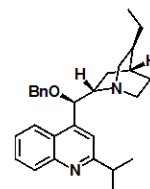

(1S,2S,4R,5S)-2-((R)-(benzyloxy)(2-isopropylquinolin-4-yl)methyl)-5-ethylquinuclidine

**6a**

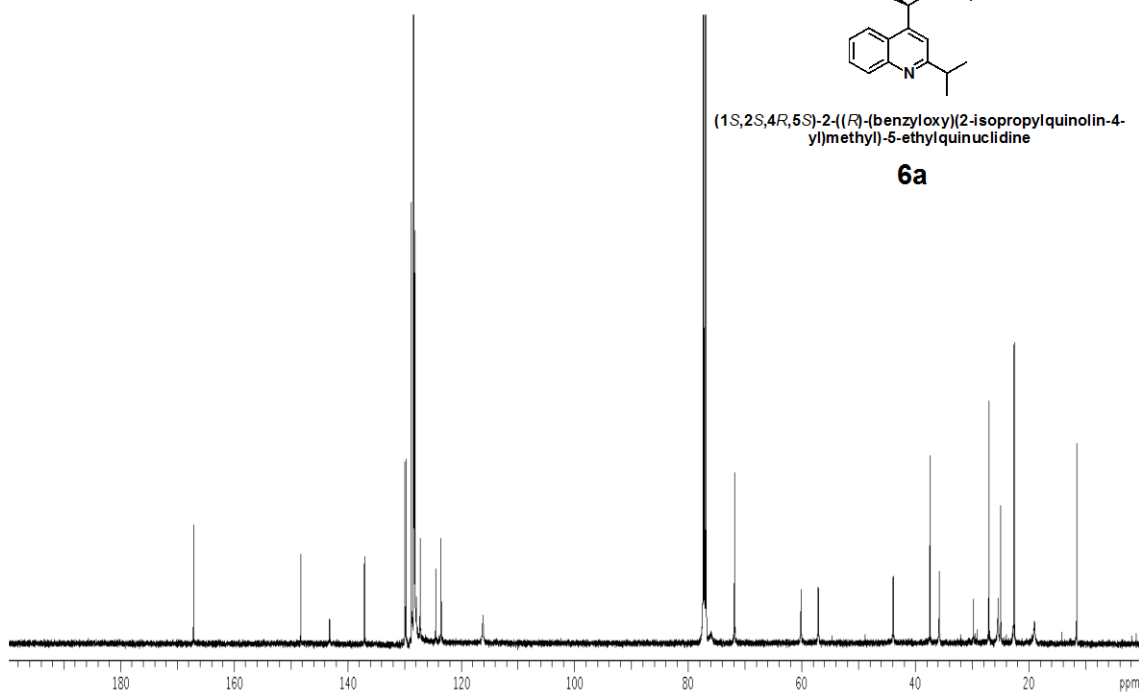

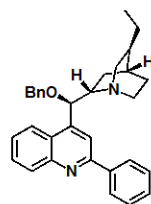

(1S,2S,4R,5S)-2-((*R*)-(benzyloxy)(2-phenylquinolin-4-yl)methyl)-5-ethylquinuclidine

**6b**

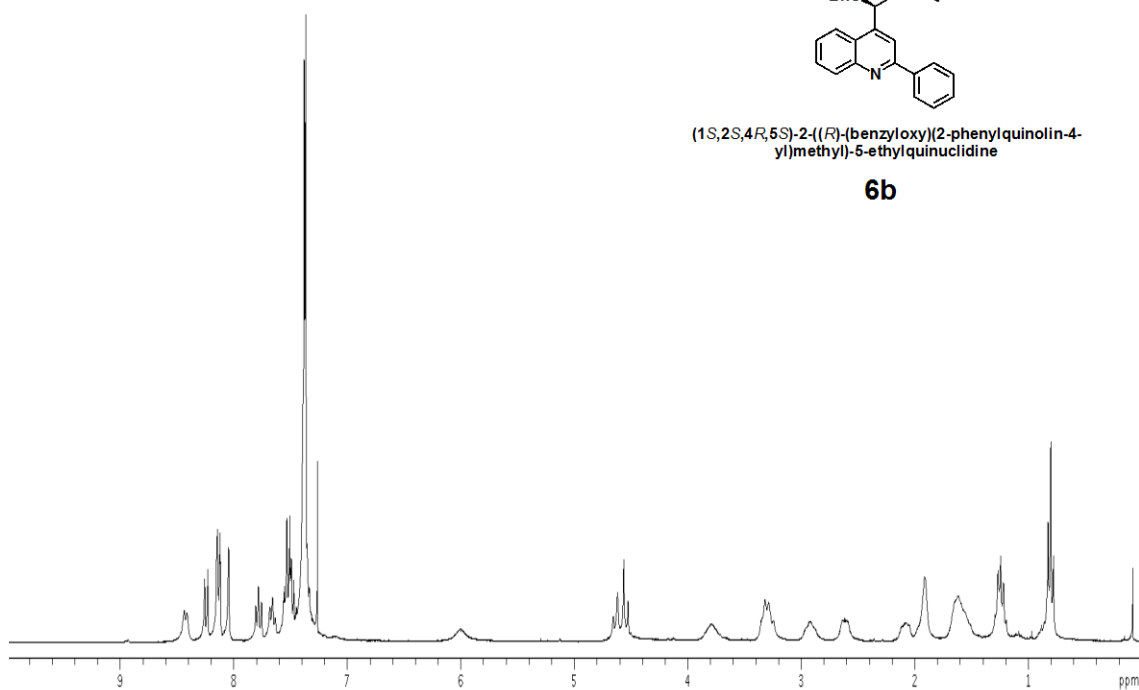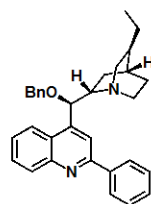

(1S,2S,4R,5S)-2-((*R*)-(benzyloxy)(2-phenylquinolin-4-yl)methyl)-5-ethylquinuclidine

**6b**

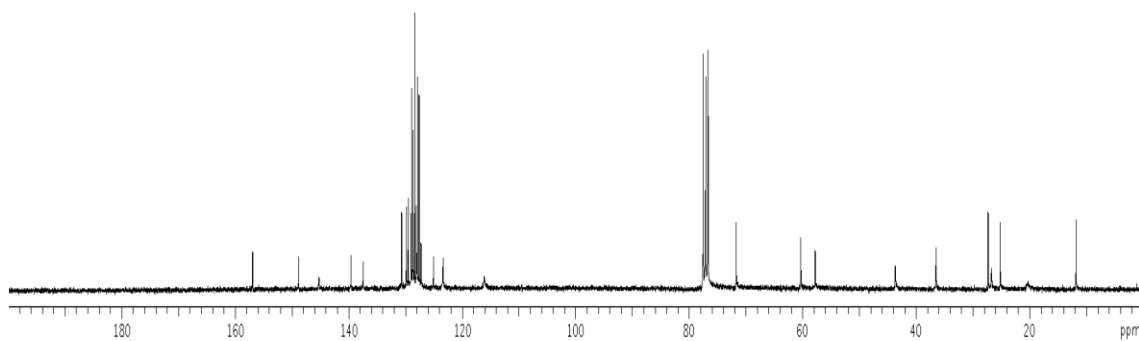

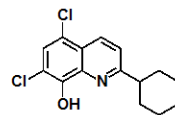

5,7-dichloro-2-cyclohexylquinolin-8-ol

**8b**

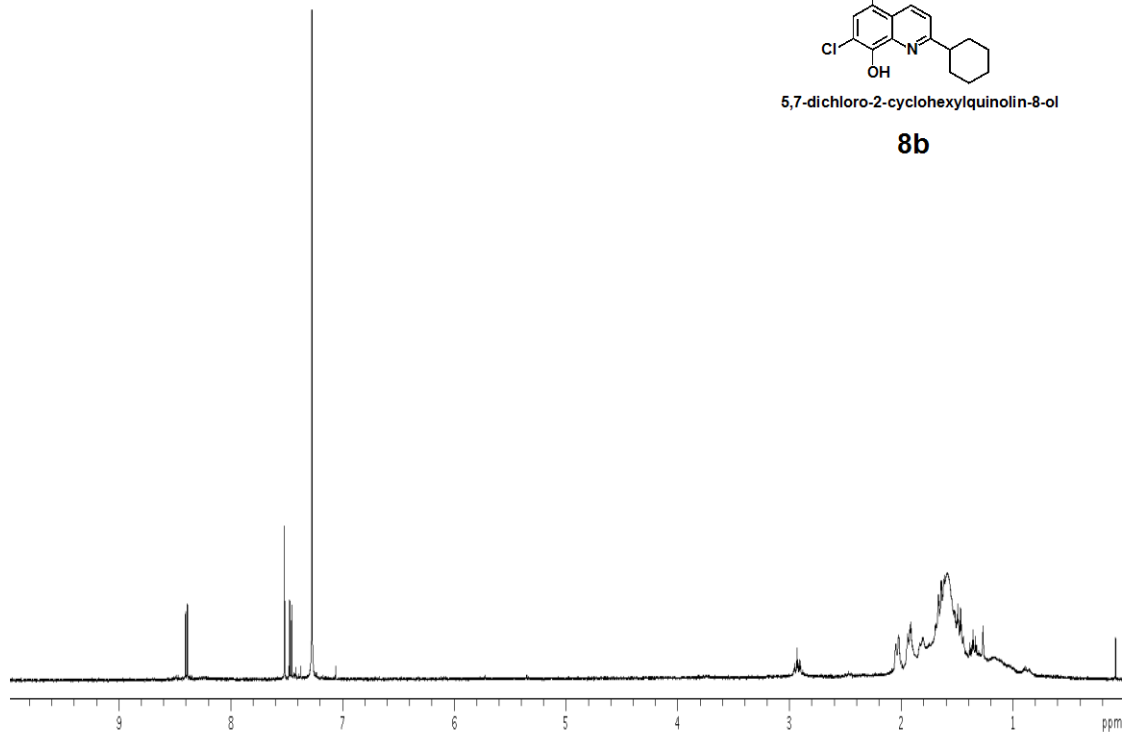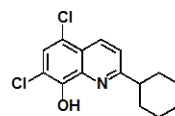

5,7-dichloro-2-cyclohexylquinolin-8-ol

**8b**

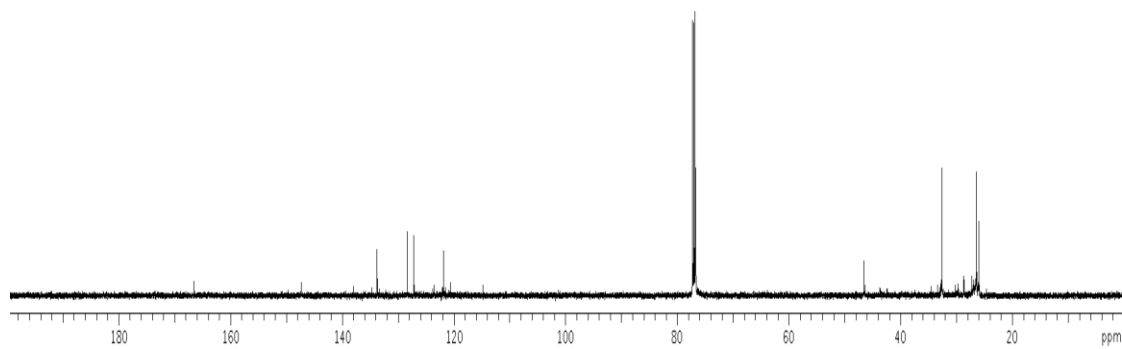

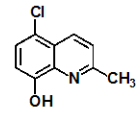

5-chloro-2-methylquinolin-8-ol

**8c**

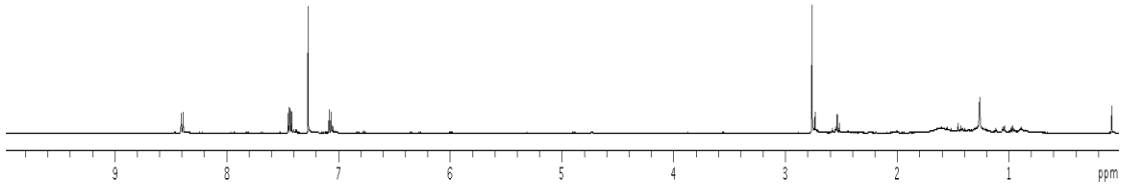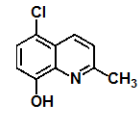

5-chloro-2-methylquinolin-8-ol

**8c**

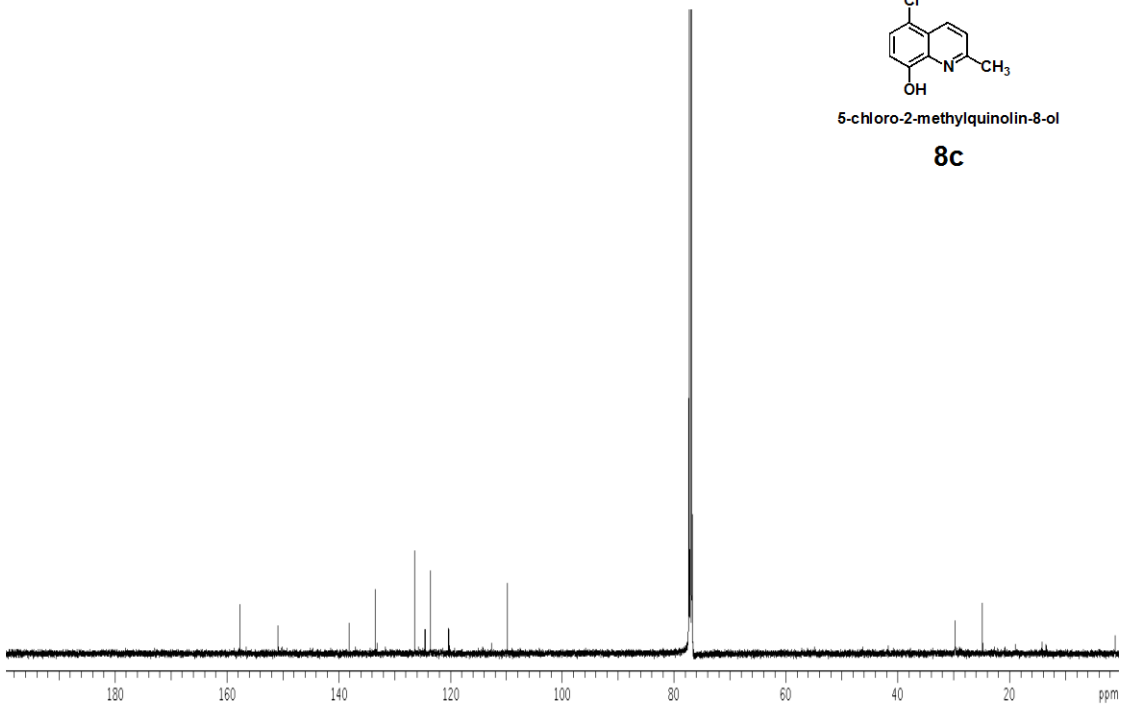

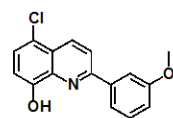

5-chloro-2-(3-methoxyphenyl)quinolin-8-ol

**8d**

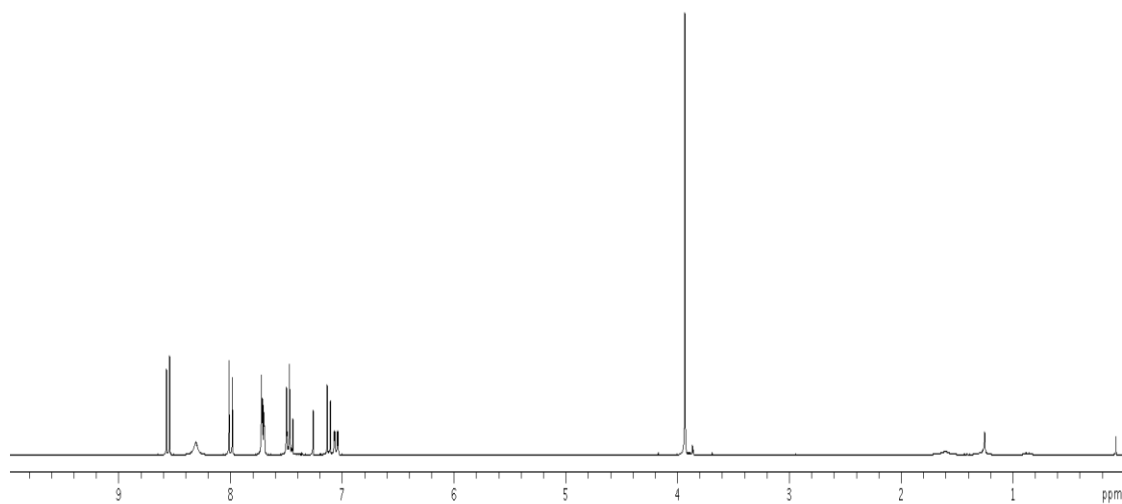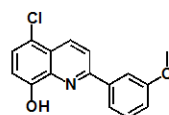

5-chloro-2-(3-methoxyphenyl)quinolin-8-ol

**8d**

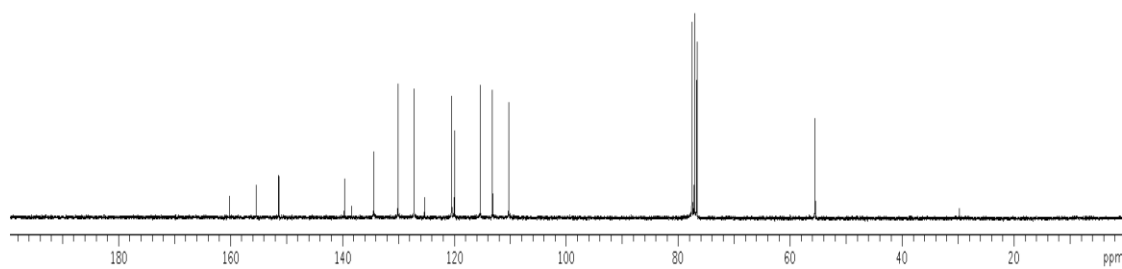

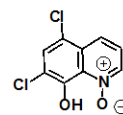

5,7-dichloro-8-hydroxyquinoline 1-oxide

**9a**

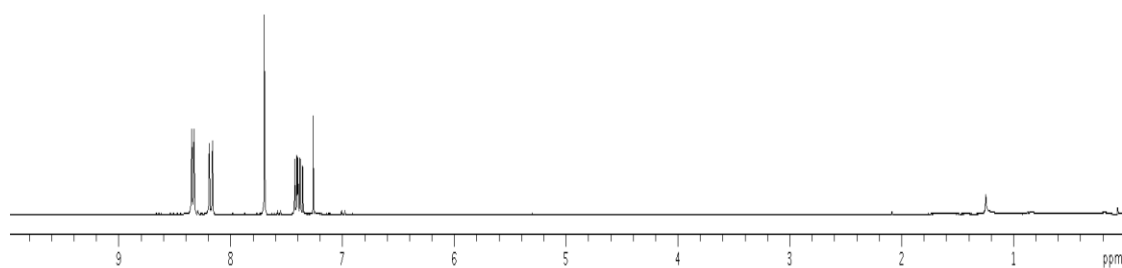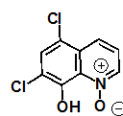

5,7-dichloro-8-hydroxyquinoline 1-oxide

**9a**

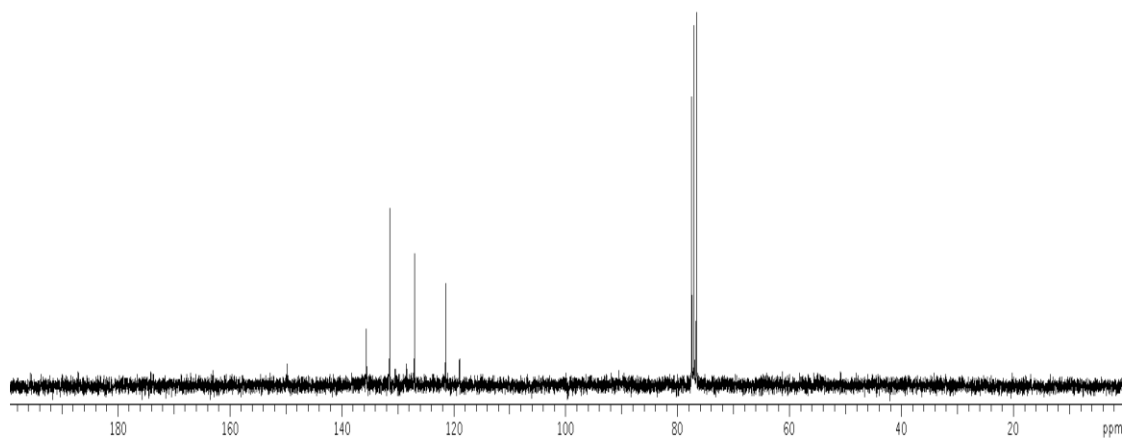

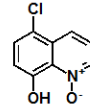

5-chloro-8-hydroxyquinoline 1-oxide

**9b**

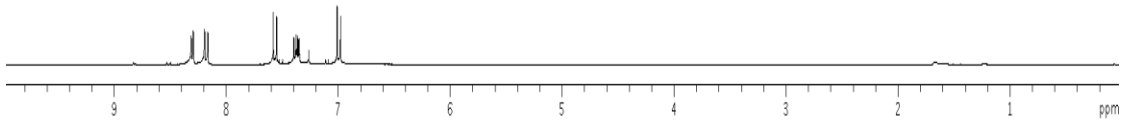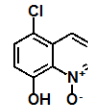

5-chloro-8-hydroxyquinoline 1-oxide

**9b**

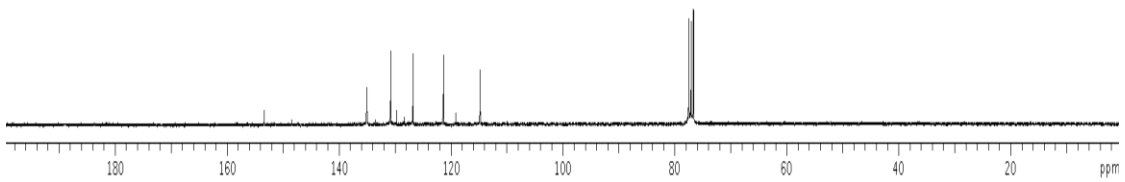

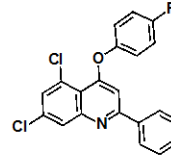

5,7-dichloro-4-(4-fluorophenoxy)-2-phenylquinoline

**10**

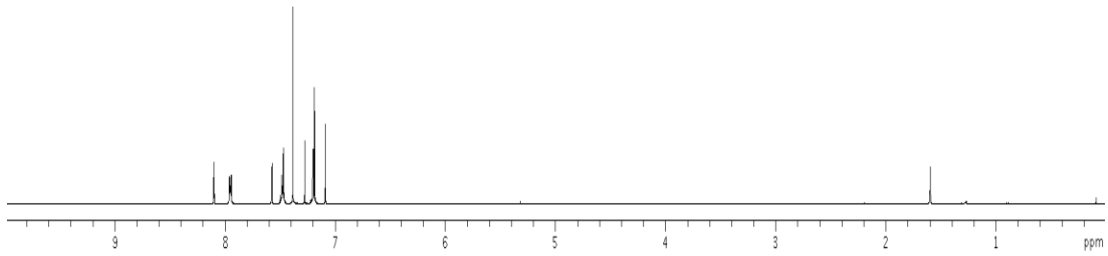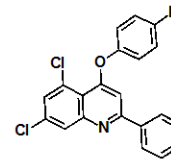

5,7-dichloro-4-(4-fluorophenoxy)-2-phenylquinoline

**10**

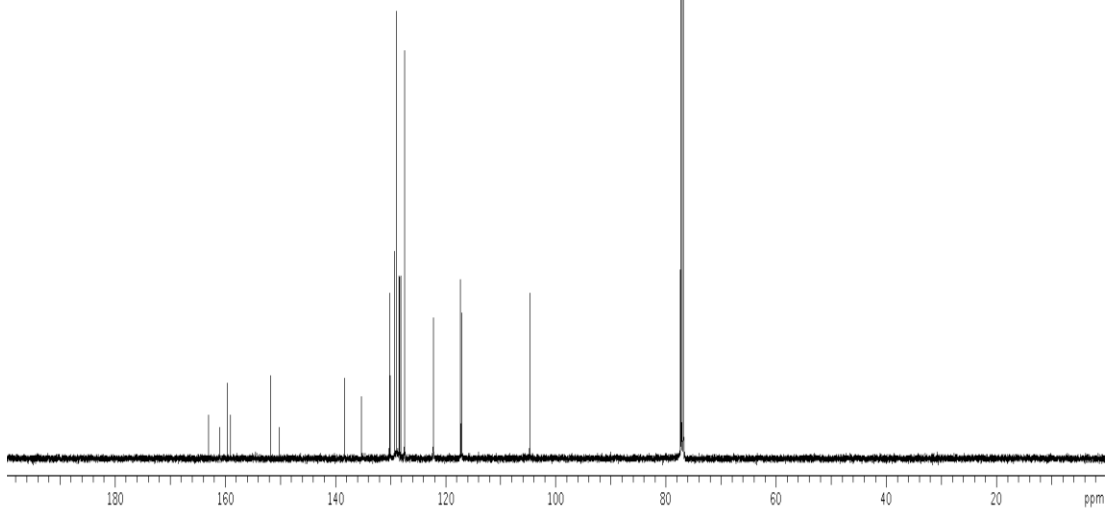



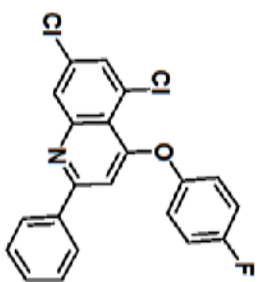

5,7-dichloro-4-(4-fluorophenoxy)-2-phenylquinoline

10

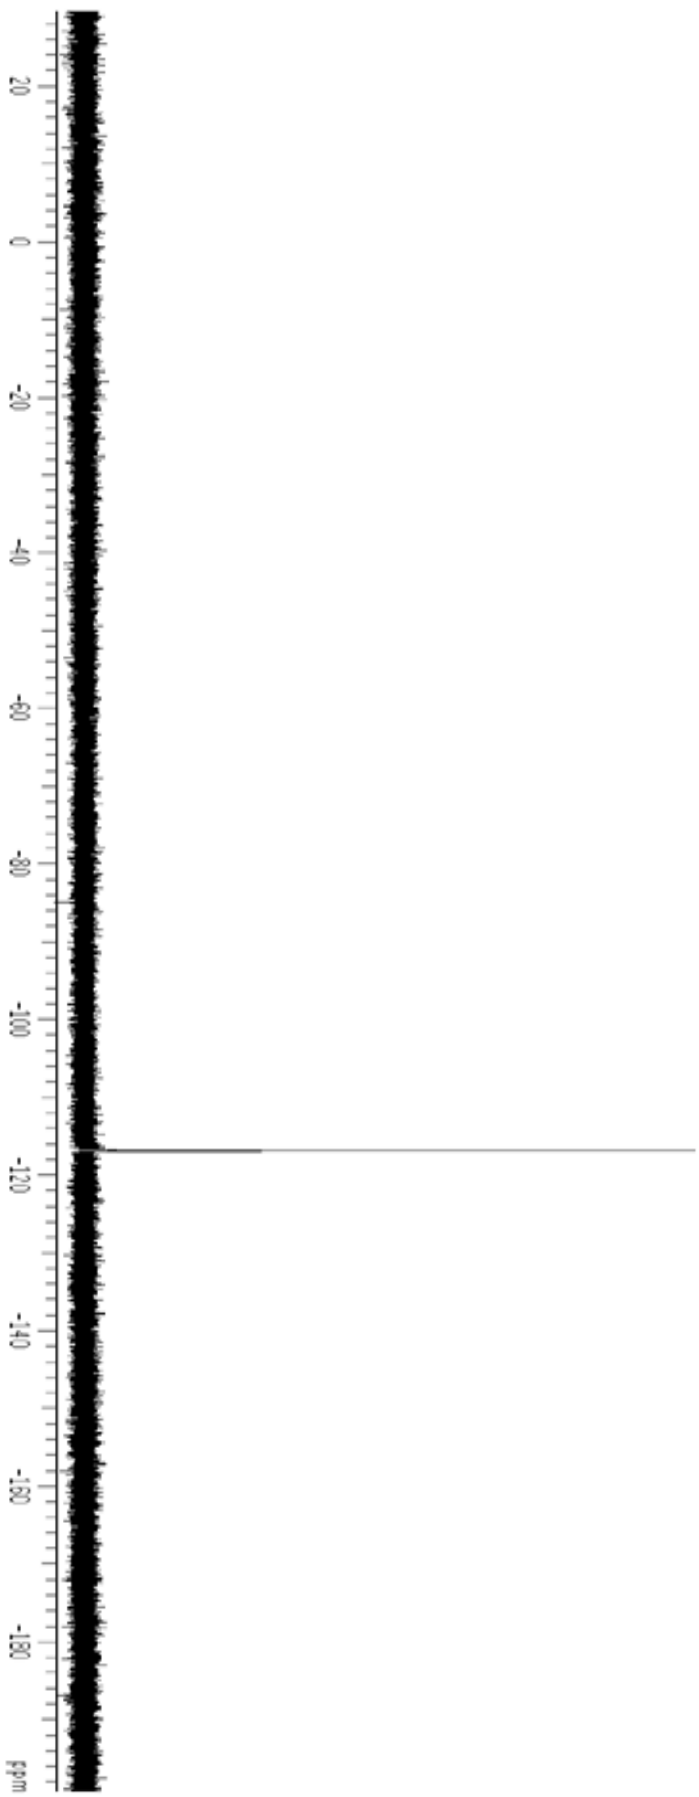

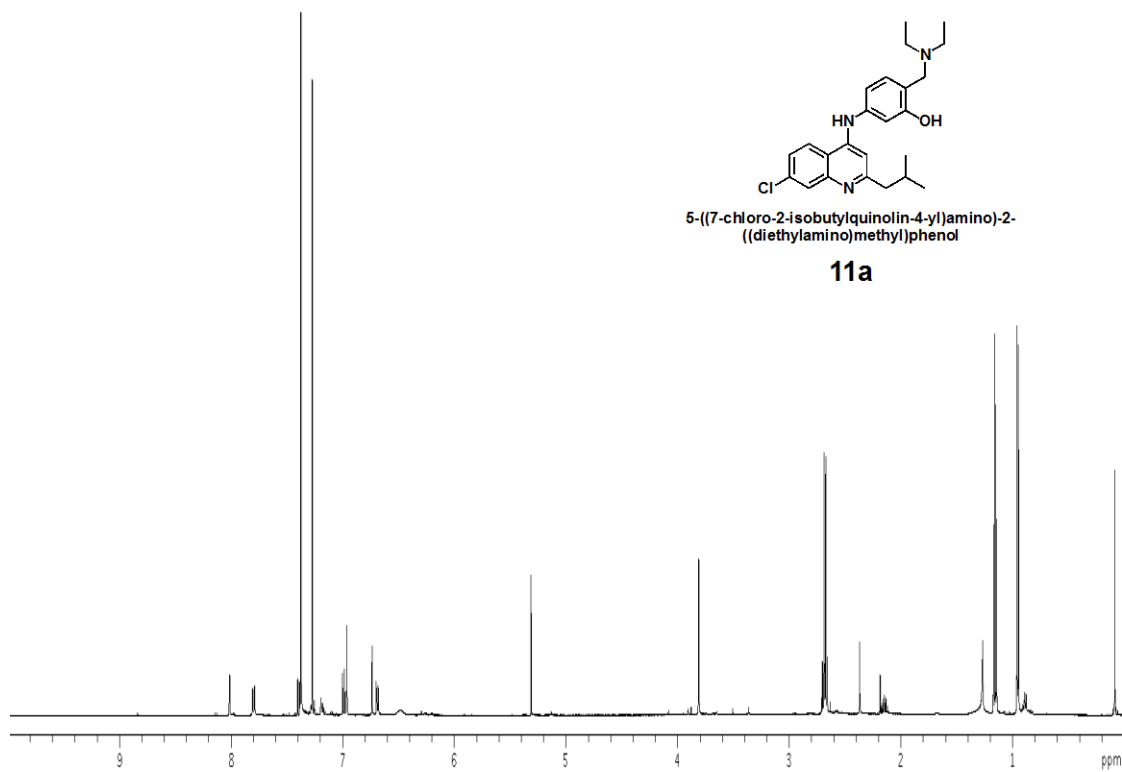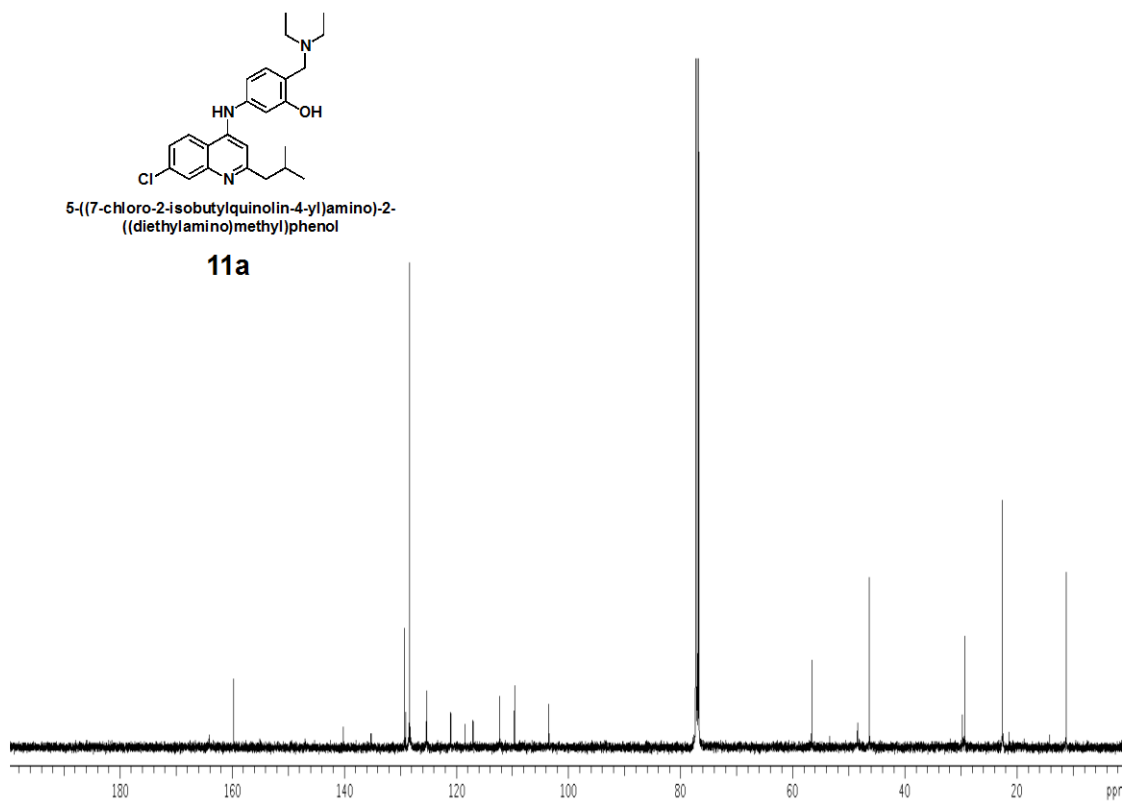

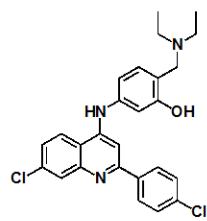

5-((7-chloro-2-(4-chlorophenyl)quinolin-4-yl)amino)-2-((diethylamino)methyl)phenol

**11b**

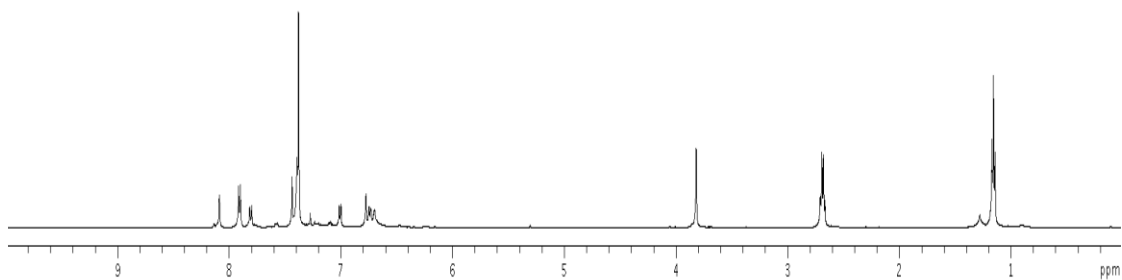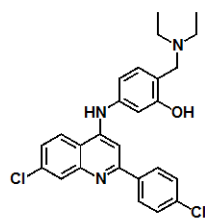

5-((7-chloro-2-(4-chlorophenyl)quinolin-4-yl)amino)-2-((diethylamino)methyl)phenol

**11b**

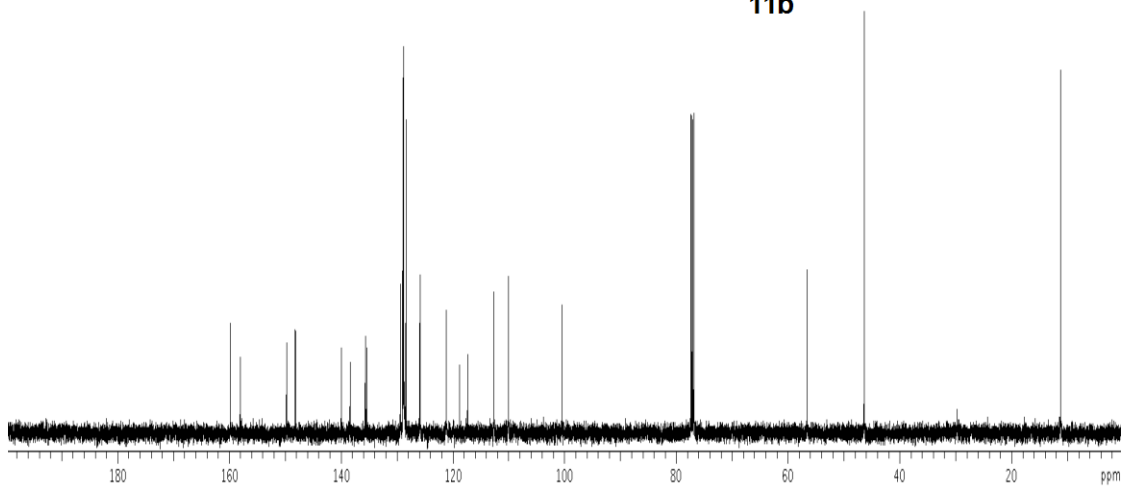

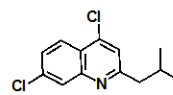

4,7-dichloro-2-isobutylquinoline

**13a**

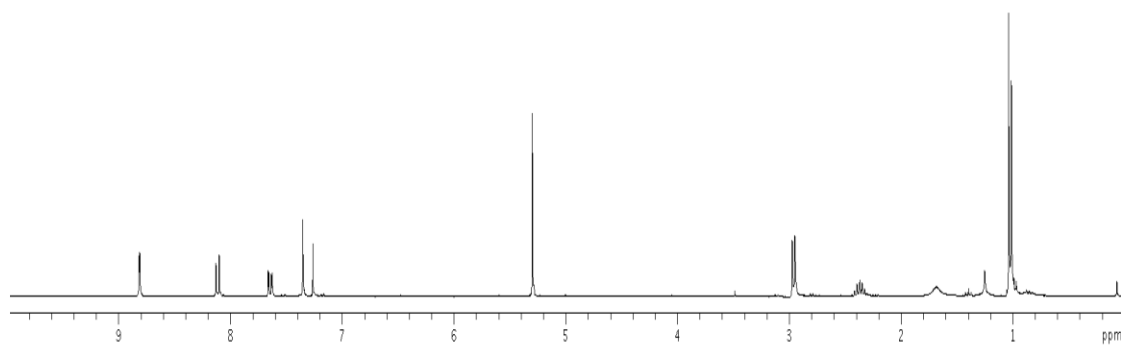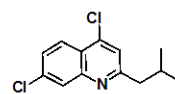

4,7-dichloro-2-isobutylquinoline

**13a**

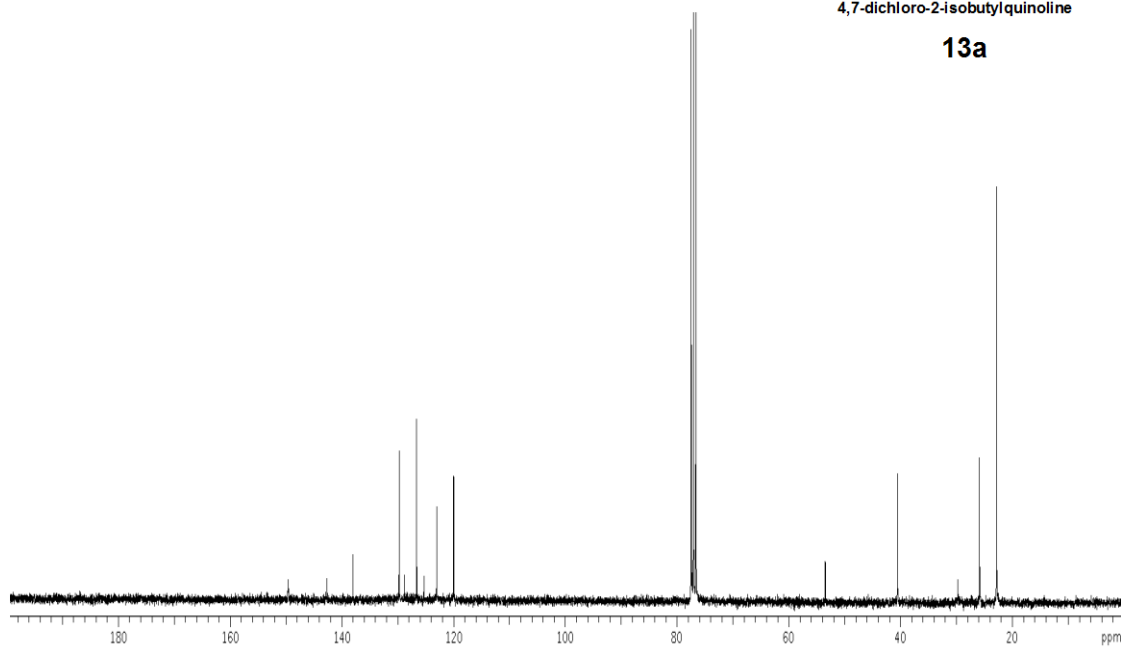

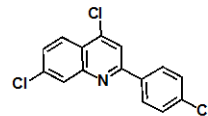

4,7-dichloro-2-(4-chlorophenyl)quinoline

**13b#**

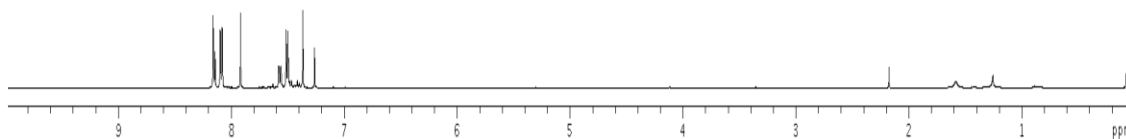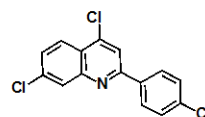

4,7-dichloro-2-(4-chlorophenyl)quinoline

**13b**

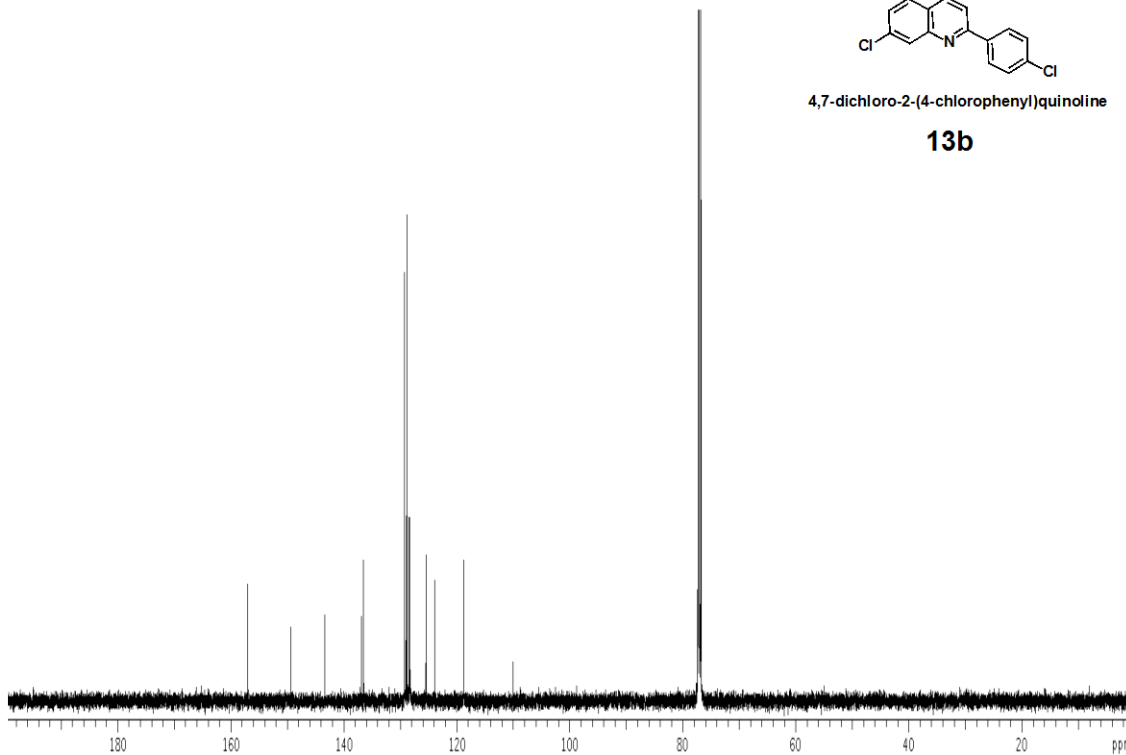

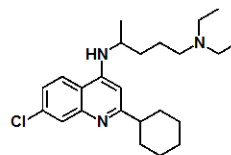

*N*<sup>4</sup>-(7-chloro-2-cyclohexylquinolin-4-yl)-*N*<sup>1</sup>,*N*<sup>1</sup>-diethylpentane-1,4-diamine

**15a**

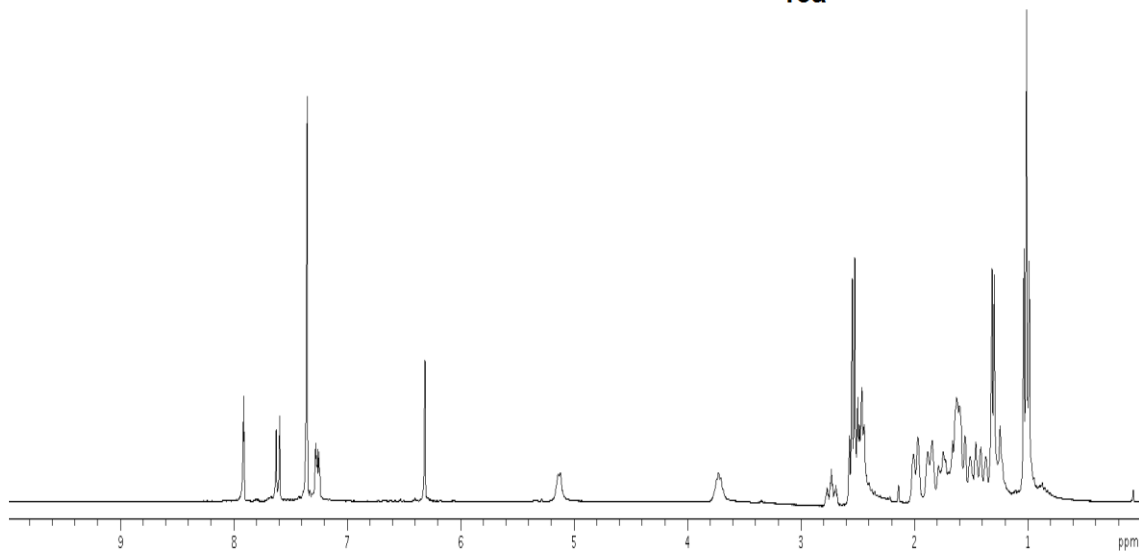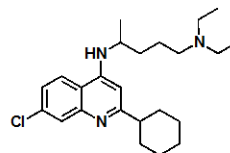

*N*<sup>4</sup>-(7-chloro-2-cyclohexylquinolin-4-yl)-*N*<sup>1</sup>,*N*<sup>1</sup>-diethylpentane-1,4-diamine

**15a**

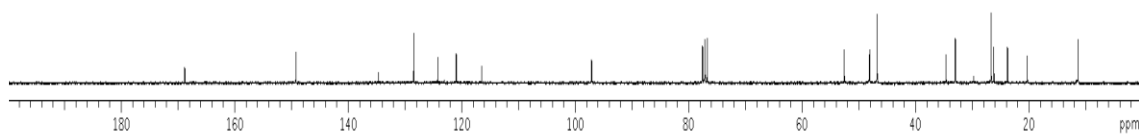

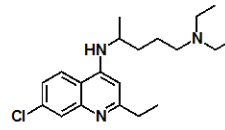

*N*<sup>4</sup>-(7-chloro-2-ethylquinolin-4-yl)-*N*<sup>1</sup>,*N*<sup>1</sup>-diethylpentane-1,4-diamine

**15b**

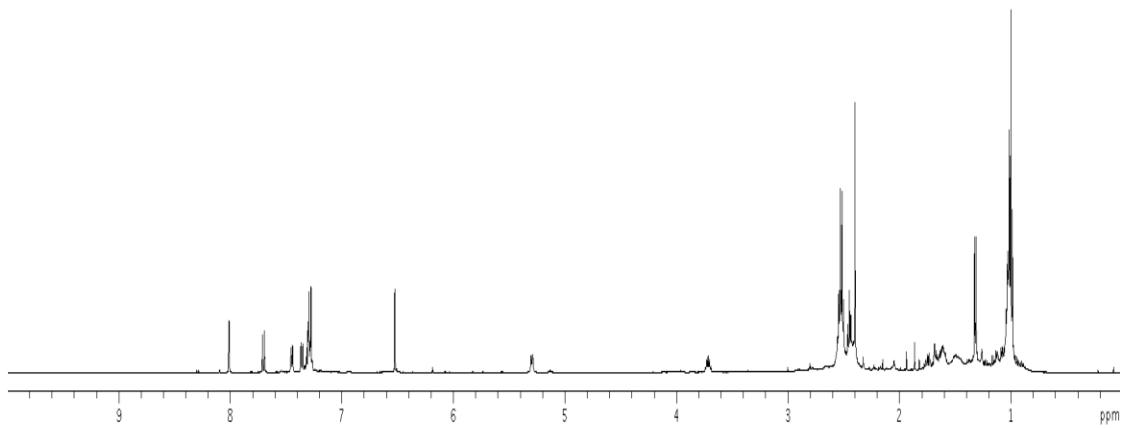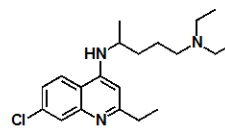

*N*<sup>4</sup>-(7-chloro-2-ethylquinolin-4-yl)-*N*<sup>1</sup>,*N*<sup>1</sup>-diethylpentane-1,4-diamine

**15b**

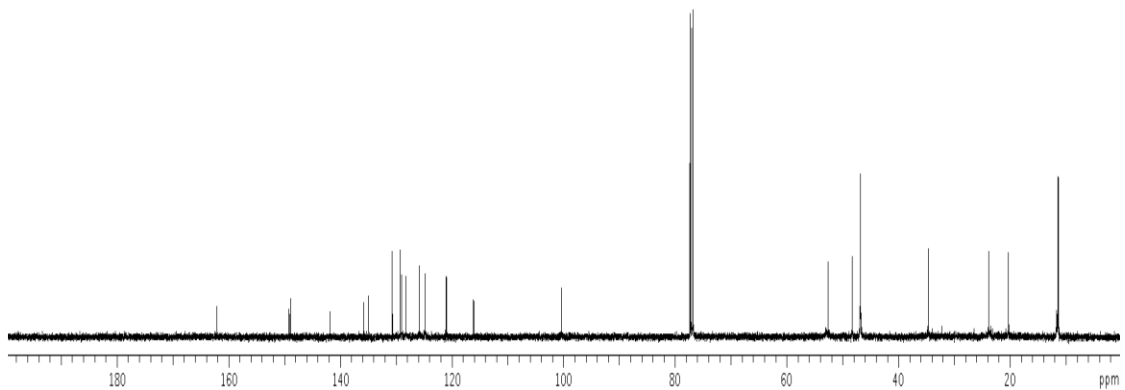

Supplement: NIHMS611353-supplement-Supporting_Information.pdf [file NIHMS611353-supplement-Supporting_Information.pdf]
